# Supplementary material for: Future costs of hydrogen: a quantitative review
Source: Royal Society of Chemistry journal article supplement (doi:10.1039/d4se00137k), 2024-01-01
Supplement: d4se00137k1.xlsx [file d4se00137k1.xlsx]

## Sheet: Tabelle2
No.	Article	Authors	DOI	Journal	Year of Publication	Study Type	Study Method	Production Type	Electrolyzer Type	Production Costs for 2020	Production Costs for 2021	Production Costs for 2022	Production Costs for 2025	Production Costs for 2030	Production Costs for 2035	Production Costs for 2040	Production Costs for 2045	Production Costs for 2050	Unit	Production Country
1	A flexible techno-economic analysis tool for regional hydrogen hubs - A case study for Ireland	Moran, Cian; Moylan, Eoghan; Reardon, Jack; Gunawan, Tubagus Aryandi; Deane, Paul; Yousefian, Sajjad; Monaghan, Rory F.D.	10.1016/j.ijhydene.2023.04.100	International Journal of Hydrogen Energy	2023	Case Study	Bottom-Up	Electrolysis	PEM					3.5					€/kg (2023)	Ireland
2	A flexible techno-economic analysis tool for regional hydrogen hubs - A case study for Ireland	Moran, Cian; Moylan, Eoghan; Reardon, Jack; Gunawan, Tubagus Aryandi; Deane, Paul; Yousefian, Sajjad; Monaghan, Rory F.D.	10.1016/j.ijhydene.2023.04.101	International Journal of Hydrogen Energy	2023	Case Study	Bottom-Up	Electrolysis	PEM					3					€/kg (2023)	Ireland
3	A flexible techno-economic analysis tool for regional hydrogen hubs - A case study for Ireland	Moran, Cian; Moylan, Eoghan; Reardon, Jack; Gunawan, Tubagus Aryandi; Deane, Paul; Yousefian, Sajjad; Monaghan, Rory F.D.	10.1016/j.ijhydene.2023.04.102	International Journal of Hydrogen Energy	2023	Case Study	Bottom-Up	Electrolysis	PEM					3.4					€/kg (2023)	Ireland
4	A flexible techno-economic analysis tool for regional hydrogen hubs - A case study for Ireland	Moran, Cian; Moylan, Eoghan; Reardon, Jack; Gunawan, Tubagus Aryandi; Deane, Paul; Yousefian, Sajjad; Monaghan, Rory F.D.	10.1016/j.ijhydene.2023.04.103	International Journal of Hydrogen Energy	2023	Case Study	Bottom-Up	Electrolysis	AE					3.15					€/kg (2023)	Ireland
5	A flexible techno-economic analysis tool for regional hydrogen hubs - A case study for Ireland	Moran, Cian; Moylan, Eoghan; Reardon, Jack; Gunawan, Tubagus Aryandi; Deane, Paul; Yousefian, Sajjad; Monaghan, Rory F.D.	10.1016/j.ijhydene.2023.04.104	International Journal of Hydrogen Energy	2023	Case Study	Bottom-Up	Electrolysis	AE					2.75					€/kg (2023)	Ireland
6	A flexible techno-economic analysis tool for regional hydrogen hubs - A case study for Ireland	Moran, Cian; Moylan, Eoghan; Reardon, Jack; Gunawan, Tubagus Aryandi; Deane, Paul; Yousefian, Sajjad; Monaghan, Rory F.D.	10.1016/j.ijhydene.2023.04.105	International Journal of Hydrogen Energy	2023	Case Study	Bottom-Up	Electrolysis	PEM					3.95					€/kg (2023)	Ireland
7	A geospatial method for estimating the levelised cost of hydrogen production from offshore wind	Dinh, Quang Vu; van Dinh, Nguyen; Mosadeghi, Hadi; Todesco Pereira, Pedro H.; Leahy, Paul G.	10.1016/j.ijhydene.2023.01.016	International Journal of Hydrogen Energy	2023	Case Study	Learning Rate	Electrolysis	PEM					3.65					€/kg (2023)	Ireland
8	A New Geographic Information System (GIS) Tool for Hydrogen Value Chain Planning Optimization: Application to Italian Highways	Guzzini, Alessandro; Brunaccini, Giovanni; Aloisio, Davide; Pellegrini, Marco; Saccani, Cesare; Sergi, Francesco	10.3390/su15032080	Sustainability	2023	Mobility	Bottom-Up	Electrolysis	PEM					6.80148				5.20734	€/kg (2023)	Italy
10	A supply curve of electricity-based hydrogen in a decarbonized European energy system in 2050	Lux, Benjamin; Pfluger, Benjamin	10.1016/j.apenergy.2020.115011	Applied Energy	2020	Forecast	Bottom-Up	Electrolysis	PEM									4.52568	€/kg (2023)	Europe
11	A Techno-Economic Analysis of solar hydrogen production by electrolysis in the north of Chile and the case of exportation from Atacama Desert to Japan	Gallardo, Felipe Ignacio; Monforti Ferrario, Andrea; Lamagna, Mario; Bocci, Enrico; Astiaso Garcia, Davide; Baeza-Jeria, Tomas E.	10.1016/j.ijhydene.2020.07.050	International Journal of Hydrogen Energy	2020	Forecast	Bottom-Up	Electrolysis	PEM				3.65965						€/kg (2023)	Chile
12	A Techno-Economic Analysis of solar hydrogen production by electrolysis in the north of Chile and the case of exportation from Atacama Desert to Japan	Gallardo, Felipe Ignacio; Monforti Ferrario, Andrea; Lamagna, Mario; Bocci, Enrico; Astiaso Garcia, Davide; Baeza-Jeria, Tomas E.	10.1016/j.ijhydene.2020.07.050	International Journal of Hydrogen Energy	2020	Forecast	Bottom-Up	Electrolysis	PEM				2.26425						€/kg (2023)	Chile
13	A Techno-Economic Analysis of solar hydrogen production by electrolysis in the north of Chile and the case of exportation from Atacama Desert to Japan	Gallardo, Felipe Ignacio; Monforti Ferrario, Andrea; Lamagna, Mario; Bocci, Enrico; Astiaso Garcia, Davide; Baeza-Jeria, Tomas E.	10.1016/j.ijhydene.2020.07.050	International Journal of Hydrogen Energy	2020	Forecast	Bottom-Up	Electrolysis	AE				3.25946						€/kg (2023)	Chile
14	A Techno-Economic Analysis of solar hydrogen production by electrolysis in the north of Chile and the case of exportation from Atacama Desert to Japan	Gallardo, Felipe Ignacio; Monforti Ferrario, Andrea; Lamagna, Mario; Bocci, Enrico; Astiaso Garcia, Davide; Baeza-Jeria, Tomas E.	10.1016/j.ijhydene.2020.07.050	International Journal of Hydrogen Energy	2020	Forecast	Bottom-Up	Electrolysis	AE				1.85352						€/kg (2023)	Chile
15	Adapting the French nuclear fleet to integrate variable renewable energies via the production of hydrogen: Towards massive production of low carbon hydrogen?	Cany, Camille; Mansilla, Christine; Da Costa, Pascal; Mathonnière, Gilles	10.1016/j.ijhydene.2017.01.146	International Journal of Hydrogen Energy	2017	Case Study	Bottom-Up	Electrolysis	PEM & AE					3.1448					€/kg (2023)	France
16	Adapting the French nuclear fleet to integrate variable renewable energies via the production of hydrogen: Towards massive production of low carbon hydrogen?	Cany, Camille; Mansilla, Christine; Da Costa, Pascal; Mathonnière, Gilles	10.1016/j.ijhydene.2017.01.147	International Journal of Hydrogen Energy	2017	Case Study	Bottom-Up	SMR						3.08546					€/kg (2023)	France
17	An outlook towards hydrogen supply chain networks in 2050 — Design of novel fuel infrastructures in Germany	Ochoa Bique, Anton; Zondervan, Edwin	https://doi.org/10.1016/j.cherd.2018.03.037	Chemical Engineering Research and Design	2018	Mobility	Bottom-Up	Coal										2.75702	€/kg (2023)	Germany
18	An outlook towards hydrogen supply chain networks in 2050 — Design of novel fuel infrastructures in Germany	Ochoa Bique, Anton; Zondervan, Edwin	https://doi.org/10.1016/j.cherd.2018.03.038	Chemical Engineering Research and Design	2018	Mobility	Bottom-Up	Electrolysis	N/A									10.5118	€/kg (2023)	Germany
19	Analysing long-term opportunities for offshore energy system integration in the Danish North Sea	McKenna, Russell; D'Andrea, Matteo; González, Mario Garzón	10.1016/j.adapen.2021.100067	Advances in Applied Energy	2021	Case Study	Bottom-Up	Electrolysis	N/A									5.54452	€/kg (2023)	Denmark
20	Assessing benefits and costs of expanded green hydrogen production to facilitate fossil fuel exit in a net-zero transition	Maynard, Ian; Abdulla, Ahmed	10.1016/j.ref.2022.12.002	Renewable Energy Focus	2023	Case Study	Learning Rate	Electrolysis	PEM				60.72					5.06	€/kg (2023)	Canada
21	Assessment of the Potential for Green Hydrogen Fuelling of Very Heavy Vehicles in New Zealand	Perez, Rapha; Brent, Alan; Hinkley, James	10.3390/en14092636	Energies	2021	Mobility	Bottom-Up	Electrolysis	PEM		4.10851			3.30445		2.75705			€/kg (2023)	New Zealand
22	At What Cost Can Renewable Hydrogen Offset Fossil Fuel Use in Ireland’s Gas Network?	Gunawan, Tubagus Aryandi; Singlitico, Alessandro; Blount, Paul; Burchill, James; Carton, James G.; Monaghan, Rory F. D.	10.3390/en13071798	Energies	2020	Case Study	Bottom-Up/Learning Rate	Electrolysis	PEM					10.9382					€/kg (2023)	Ireland
23	Baseload electricity and hydrogen supply based on hybrid PV-wind power plants	Fasihi, Mahdi; Breyer, Christian	10.1016/j.jclepro.2019.118474	Journal of Cleaner Production	2020	Forecast	Learning Rate	Electrolysis	AE					2.25141				1.76101	€/kg (2023)	Europe
24	Baseload electricity and hydrogen supply based on hybrid PV-wind power plants	Fasihi, Mahdi; Breyer, Christian	10.1016/j.jclepro.2019.118469	Journal of Cleaner Production	2020	Forecast	Learning Rate	Electrolysis	AE					2.36287				1.87246	€/kg (2023)	Eurasia
25	Baseload electricity and hydrogen supply based on hybrid PV-wind power plants	Fasihi, Mahdi; Breyer, Christian	10.1016/j.jclepro.2019.118468	Journal of Cleaner Production	2020	Forecast	Learning Rate	Electrolysis	AE					2.16225				1.5158	€/kg (2023)	MENA
26	Baseload electricity and hydrogen supply based on hybrid PV-wind power plants	Fasihi, Mahdi; Breyer, Christian	10.1016/j.jclepro.2019.118471	Journal of Cleaner Production	2020	Forecast	Learning Rate	Electrolysis	AE					1.87246				1.47122	€/kg (2023)	Sub-Saharan Africa
27	Baseload electricity and hydrogen supply based on hybrid PV-wind power plants	Fasihi, Mahdi; Breyer, Christian	10.1016/j.jclepro.2019.118472	Journal of Cleaner Production	2020	Forecast	Learning Rate	Electrolysis	AE					2.20683				1.69413	€/kg (2023)	SAARC
28	Baseload electricity and hydrogen supply based on hybrid PV-wind power plants	Fasihi, Mahdi; Breyer, Christian	10.1016/j.jclepro.2019.118473	Journal of Cleaner Production	2020	Forecast	Learning Rate	Electrolysis	AE					1.96163				1.5158	€/kg (2023)	Northeast Asia
29	Baseload electricity and hydrogen supply based on hybrid PV-wind power plants	Fasihi, Mahdi; Breyer, Christian	10.1016/j.jclepro.2019.118470	Journal of Cleaner Production	2020	Forecast	Learning Rate	Electrolysis	AE					2.07308				1.60497	€/kg (2023)	Southeast Asia
30	Baseload electricity and hydrogen supply based on hybrid PV-wind power plants	Fasihi, Mahdi; Breyer, Christian	10.1016/j.jclepro.2019.118466	Journal of Cleaner Production	2020	Forecast	Learning Rate	Electrolysis	AE					2.11767				1.62726	€/kg (2023)	North America
31	Baseload electricity and hydrogen supply based on hybrid PV-wind power plants	Fasihi, Mahdi; Breyer, Christian	10.1016/j.jclepro.2019.118467	Journal of Cleaner Production	2020	Forecast	Learning Rate	Electrolysis	AE					1.76101				1.38206	€/kg (2023)	South America
32	Bi-objective optimal design of Hydrogen and Methane Supply Chains based on Power-to-Gas systems	Carrera, Eduardo; Azzaro-Pantel, Catherine	10.1016/j.ces.2021.116861	Chemical Engineering Science	2021	Case Study	Bottom-Up	Electrolysis	AE							5.73013		3.93244	€/kg (2023)	France
33	Bi-objective optimal design of Hydrogen and Methane Supply Chains based on Power-to-Gas systems	Carrera, Eduardo; Azzaro-Pantel, Catherine	10.1016/j.ces.2021.116861	Chemical Engineering Science	2021	Case Study	Bottom-Up	Electrolysis	AE							5.61778		4.41932	€/kg (2023)	France
34	Building a hydrogen infrastructure in Norway	Stiller, Christoph; Svensson, Ann Mari; Rosenberg, Eva; Møller-Holst, Steffen; Bünger, Ulrich	10.3390/wevj3010104	World Electric Vehicle Journal	2009	Mobility	Bottom-Up	Mix (Biomass, SMR, Electrolysis)	N/A	7.8689			4.98364	4.78692	4.91806	5.04921	5.37708	5.57381	€/kg (2023)	Norway
35	Can energy storage make off-grid photovoltaic hydrogen production system more economical?	Li, Xingmei; Lv, Xiaoyan; Zhang, Wenzuo; Xu, Chuanbo	10.1007/s42524-022-0245-x	Frontiers of Engineering Management	2023	Case Study	Learning Rate	Electrolysis	AE	2.67391				1.61256		1.12617		0.842586	€/kg (2023)	China
36	Can energy storage make off-grid photovoltaic hydrogen production system more economical?	Li, Xingmei; Lv, Xiaoyan; Zhang, Wenzuo; Xu, Chuanbo	10.1007/s42524-022-0245-x	Frontiers of Engineering Management	2023	Case Study	Learning Rate	Electrolysis	AE	2.88693				1.58154		1.11559		0.852057	€/kg (2023)	China
37	Can energy storage make off-grid photovoltaic hydrogen production system more economical?	Li, Xingmei; Lv, Xiaoyan; Zhang, Wenzuo; Xu, Chuanbo	10.1007/s42524-022-0245-x	Frontiers of Engineering Management	2023	Case Study	Learning Rate	SMR		1.2025									€/kg (2023)	China
38	Can energy storage make off-grid photovoltaic hydrogen production system more economical?	Li, Xingmei; Lv, Xiaoyan; Zhang, Wenzuo; Xu, Chuanbo	10.1007/s42524-022-0245-x	Frontiers of Engineering Management	2023	Case Study	Learning Rate	SMR + CCS		1.7186									€/kg (2023)	China
39	Can energy storage make off-grid photovoltaic hydrogen production system more economical?	Li, Xingmei; Lv, Xiaoyan; Zhang, Wenzuo; Xu, Chuanbo	10.1007/s42524-022-0245-x	Frontiers of Engineering Management	2023	Case Study	Learning Rate	Coal		0.9451									€/kg (2023)	China
40	Can energy storage make off-grid photovoltaic hydrogen production system more economical?	Li, Xingmei; Lv, Xiaoyan; Zhang, Wenzuo; Xu, Chuanbo	10.1007/s42524-022-0245-x	Frontiers of Engineering Management	2023	Case Study	Learning Rate	Coal + CCS		1.1765									€/kg (2023)	China
41	Can Hydrogen Production Be Economically Viable on the Existing Gas-Fired Power Plant Location? New Empirical Evidence	Dumančić, Andrea; Vlahinić Lenz, Nela; Majstrović, Goran	10.3390/en16093737	Energies	2023	Case Study	Bottom-Up	Electrolysis	PEM				2.81	3.13		3.14		2.82	€/kg (2023)	Germany
42	Can Industrial-Scale Solar Hydrogen Supplied from Commodity Technologies Be Cost Competitive by 2030?	Mallapragada, Dharik Sanchan; Gençer, Emre; Insinger, Patrick; Keith, David William; O’Sullivan, Francis Martin	10.1016/j.xcrp.2020.100174	Cell Reports Physical Science	2020	Case Study	Bottom-Up	Electrolysis	PEM					3.00144					€/kg (2023)	USA
43	Can Industrial-Scale Solar Hydrogen Supplied from Commodity Technologies Be Cost Competitive by 2030?	Mallapragada, Dharik Sanchan; Gençer, Emre; Insinger, Patrick; Keith, David William; O’Sullivan, Francis Martin	10.1016/j.xcrp.2020.100175	Cell Reports Physical Science	2021	Case Study	Bottom-Up	Electrolysis	PEM					2.18984					€/kg (2023)	USA
44	Coal Gasification: At the Crossroads. Economic Outlook	Fillipov, S.P.; Keiko, A.V.	10.1134/S0040601521050049	Thermal Engineering	2021	Forecast	Bottom-Up	Electrolysis	N/A									2.70895	€/kg (2023)	Russia
45	Coal Gasification: At the Crossroads. Economic Outlook	Fillipov, S.P.; Keiko, A.V.	10.1134/S0040601521050049	Thermal Engineering	2021	Forecast	Bottom-Up	Electrolysis	N/A									1.24837	€/kg (2023)	Russia
46	Coal Gasification: At the Crossroads. Economic Outlook	Fillipov, S.P.; Keiko, A.V.	10.1134/S0040601521050049	Thermal Engineering	2021	Forecast	Bottom-Up	Coal								2.02859			€/kg (2023)	Russia
47	Comparative Economic Optimization for an Overseas Hydrogen Supply Chain Using Mixed-Integer Linear Programming	Kim, Ayeon; Kim, Heehyang; Lee, Hyunjun; Lee, Boreum; Lim, Hankwon	10.1021/acssuschemeng.1c05446	ACS Sustainable Chem. Eng. (ACS Sustainable Chemistry & Engineering)	2021	Global Trade	Historic Data Regression	SMR + CCS					2.25746						€/kg (2023)	Qatar
48	Comparative Economic Optimization for an Overseas Hydrogen Supply Chain Using Mixed-Integer Linear Programming	Kim, Ayeon; Kim, Heehyang; Lee, Hyunjun; Lee, Boreum; Lim, Hankwon	10.1021/acssuschemeng.1c05446	ACS Sustainable Chem. Eng. (ACS Sustainable Chemistry & Engineering)	2021	Global Trade	Historic Data Regression	SMR + CCS					2.46552						€/kg (2023)	Russia
49	Comparative Economic Optimization for an Overseas Hydrogen Supply Chain Using Mixed-Integer Linear Programming	Kim, Ayeon; Kim, Heehyang; Lee, Hyunjun; Lee, Boreum; Lim, Hankwon	10.1021/acssuschemeng.1c05446	ACS Sustainable Chem. Eng. (ACS Sustainable Chemistry & Engineering)	2021	Global Trade	Historic Data Regression	SMR + CCS						2.36149					€/kg (2023)	Qatar
50	Comparative Economic Optimization for an Overseas Hydrogen Supply Chain Using Mixed-Integer Linear Programming	Kim, Ayeon; Kim, Heehyang; Lee, Hyunjun; Lee, Boreum; Lim, Hankwon	10.1021/acssuschemeng.1c05446	ACS Sustainable Chem. Eng. (ACS Sustainable Chemistry & Engineering)	2021	Global Trade	Historic Data Regression	Electrolysis	PEM					2.4031					€/kg (2023)	UAE
51	Comparative Economic Optimization for an Overseas Hydrogen Supply Chain Using Mixed-Integer Linear Programming	Kim, Ayeon; Kim, Heehyang; Lee, Hyunjun; Lee, Boreum; Lim, Hankwon	10.1021/acssuschemeng.1c05446	ACS Sustainable Chem. Eng. (ACS Sustainable Chemistry & Engineering)	2021	Global Trade	Historic Data Regression	SMR + CCS						2.48633					€/kg (2023)	Russia
52	Comparative Economic Optimization for an Overseas Hydrogen Supply Chain Using Mixed-Integer Linear Programming	Kim, Ayeon; Kim, Heehyang; Lee, Hyunjun; Lee, Boreum; Lim, Hankwon	10.1021/acssuschemeng.1c05446	ACS Sustainable Chem. Eng. (ACS Sustainable Chemistry & Engineering)	2021	Global Trade	Historic Data Regression	Electrolysis	PEM							2.30948			€/kg (2023)	India
53	Comparative Economic Optimization for an Overseas Hydrogen Supply Chain Using Mixed-Integer Linear Programming	Kim, Ayeon; Kim, Heehyang; Lee, Hyunjun; Lee, Boreum; Lim, Hankwon	10.1021/acssuschemeng.1c05446	ACS Sustainable Chem. Eng. (ACS Sustainable Chemistry & Engineering)	2021	Global Trade	Historic Data Regression	SMR + CCS								2.49673			€/kg (2023)	Qatar
54	Comparative Economic Optimization for an Overseas Hydrogen Supply Chain Using Mixed-Integer Linear Programming	Kim, Ayeon; Kim, Heehyang; Lee, Hyunjun; Lee, Boreum; Lim, Hankwon	10.1021/acssuschemeng.1c05446	ACS Sustainable Chem. Eng. (ACS Sustainable Chemistry & Engineering)	2021	Global Trade	Historic Data Regression	SMR + CCS								2.59036			€/kg (2023)	Russia
55	Comparative Economic Optimization for an Overseas Hydrogen Supply Chain Using Mixed-Integer Linear Programming	Kim, Ayeon; Kim, Heehyang; Lee, Hyunjun; Lee, Boreum; Lim, Hankwon	10.1021/acssuschemeng.1c05446	ACS Sustainable Chem. Eng. (ACS Sustainable Chemistry & Engineering)	2021	Global Trade	Historic Data Regression	Electrolysis	PEM							2.92326			€/kg (2023)	Australia
56	Cost and low-carbon competitiveness of electrolytic hydrogen in China	Pan, Guangsheng; Gu, Wei; Hu, Qinran; Wang, Jianxiao; Teng, Fei; Strbac, Goran	10.1039/D1EE01840J	Energy Environ. Sci. (Energy & Environmental Science)	2021	Case Study	Bottom-Up	Electrolysis	PEM	5.61381			4.87867	4.34402		3.20789		2.40592	€/kg (2023)	China
57	Country-specific cost projections for renewable hydrogen production through off-grid electricity systems	Janssen, Jacob L.L.C.C.; Weeda, Marcel, Detz, Remko J.; van der Zwaan, Bob	10.1016/j.apenergy.2021.118423	Applied Energy	2022	Forecast	Learning Rate	Electrolysis	N/A	7.09772				5.44375		4.6434		4.04865	€/kg (2023)	Europe
58	Country-specific cost projections for renewable hydrogen production through off-grid electricity systems	Janssen, Jacob L.L.C.C.; Weeda, Marcel, Detz, Remko J.; van der Zwaan, Bob	10.1016/j.apenergy.2021.118408	Applied Energy	2022	Forecast	Learning Rate	Electrolysis	N/A	3.65095				3.29836		3.05019		2.83409	€/kg (2023)	Europe
59	Country-specific cost projections for renewable hydrogen production through off-grid electricity systems	Janssen, Jacob L.L.C.C.; Weeda, Marcel, Detz, Remko J.; van der Zwaan, Bob	10.1016/j.apenergy.2021.118420	Applied Energy	2022	Forecast	Learning Rate	Electrolysis	N/A	5.00933				4.09141		3.75522		3.5755	€/kg (2023)	Europe
60	Country-specific cost projections for renewable hydrogen production through off-grid electricity systems	Janssen, Jacob L.L.C.C.; Weeda, Marcel, Detz, Remko J.; van der Zwaan, Bob	10.1016/j.apenergy.2021.118414	Applied Energy	2022	Forecast	Learning Rate	Electrolysis	N/A	4.10518				3.70828		3.42856		3.18489	€/kg (2023)	Germany
61	Country-specific cost projections for renewable hydrogen production through off-grid electricity systems	Janssen, Jacob L.L.C.C.; Weeda, Marcel, Detz, Remko J.; van der Zwaan, Bob	10.1016/j.apenergy.2021.118429	Applied Energy	2022	Forecast	Learning Rate	Electrolysis	N/A	4.27605				3.49247		3.20551		3.05213	€/kg (2023)	Germany
62	Country-specific cost projections for renewable hydrogen production through off-grid electricity systems	Janssen, Jacob L.L.C.C.; Weeda, Marcel, Detz, Remko J.; van der Zwaan, Bob	10.1016/j.apenergy.2021.118417	Applied Energy	2022	Forecast	Learning Rate	Electrolysis	N/A	7.82595				6.00671		5.12444		4.46802	€/kg (2023)	Germany
63	Country-specific cost projections for renewable hydrogen production through off-grid electricity systems	Janssen, Jacob L.L.C.C.; Weeda, Marcel, Detz, Remko J.; van der Zwaan, Bob	10.1016/j.apenergy.2021.118409	Applied Energy	2022	Forecast	Learning Rate	Electrolysis	N/A	3.62254				3.27177		3.02416		2.80832	€/kg (2023)	France
64	Country-specific cost projections for renewable hydrogen production through off-grid electricity systems	Janssen, Jacob L.L.C.C.; Weeda, Marcel, Detz, Remko J.; van der Zwaan, Bob	10.1016/j.apenergy.2021.118421	Applied Energy	2022	Forecast	Learning Rate	Electrolysis	N/A	4.43214				3.62078		3.32279		3.16293	€/kg (2023)	France
65	Country-specific cost projections for renewable hydrogen production through off-grid electricity systems	Janssen, Jacob L.L.C.C.; Weeda, Marcel, Detz, Remko J.; van der Zwaan, Bob	10.1016/j.apenergy.2021.118425	Applied Energy	2022	Forecast	Learning Rate	Electrolysis	N/A	5.93716				4.5618		3.89269		3.39398	€/kg (2023)	France
66	Country-specific cost projections for renewable hydrogen production through off-grid electricity systems	Janssen, Jacob L.L.C.C.; Weeda, Marcel, Detz, Remko J.; van der Zwaan, Bob	10.1016/j.apenergy.2021.118415	Applied Energy	2022	Forecast	Learning Rate	Electrolysis	N/A	2.46776				2.22531		2.05138		1.89895	€/kg (2023)	Denmark
67	Country-specific cost projections for renewable hydrogen production through off-grid electricity systems	Janssen, Jacob L.L.C.C.; Weeda, Marcel, Detz, Remko J.; van der Zwaan, Bob	10.1016/j.apenergy.2021.118424	Applied Energy	2022	Forecast	Learning Rate	Electrolysis	N/A	3.53324				2.89397		2.65134		2.51588	€/kg (2023)	Denmark
68	Country-specific cost projections for renewable hydrogen production through off-grid electricity systems	Janssen, Jacob L.L.C.C.; Weeda, Marcel, Detz, Remko J.; van der Zwaan, Bob	10.1016/j.apenergy.2021.118430	Applied Energy	2022	Forecast	Learning Rate	Electrolysis	N/A	7.1552				5.55398		4.75021		4.1409	€/kg (2023)	Denmark
69	Country-specific cost projections for renewable hydrogen production through off-grid electricity systems	Janssen, Jacob L.L.C.C.; Weeda, Marcel, Detz, Remko J.; van der Zwaan, Bob	10.1016/j.apenergy.2021.118405	Applied Energy	2022	Forecast	Learning Rate	Electrolysis	N/A	3.81662				3.44515		3.18141		2.95107	€/kg (2023)	Italy
70	Country-specific cost projections for renewable hydrogen production through off-grid electricity systems	Janssen, Jacob L.L.C.C.; Weeda, Marcel, Detz, Remko J.; van der Zwaan, Bob	10.1016/j.apenergy.2021.118399	Applied Energy	2022	Forecast	Learning Rate	Electrolysis	N/A	7.1478				5.84457		5.36045		5.09704	€/kg (2023)	Italy
71	Country-specific cost projections for renewable hydrogen production through off-grid electricity systems	Janssen, Jacob L.L.C.C.; Weeda, Marcel, Detz, Remko J.; van der Zwaan, Bob	10.1016/j.apenergy.2021.118426	Applied Energy	2022	Forecast	Learning Rate	Electrolysis	N/A	5.84571				4.50781		3.84976		3.35634	€/kg (2023)	Italy
72	Country-specific cost projections for renewable hydrogen production through off-grid electricity systems	Janssen, Jacob L.L.C.C.; Weeda, Marcel, Detz, Remko J.; van der Zwaan, Bob	10.1016/j.apenergy.2021.118411	Applied Energy	2022	Forecast	Learning Rate	Electrolysis	N/A	3.05282				2.75309		2.53822		2.34995	€/kg (2023)	Sweden
73	Country-specific cost projections for renewable hydrogen production through off-grid electricity systems	Janssen, Jacob L.L.C.C.; Weeda, Marcel, Detz, Remko J.; van der Zwaan, Bob	10.1016/j.apenergy.2021.118418	Applied Energy	2022	Forecast	Learning Rate	Electrolysis	N/A	3.79312				3.10646		2.84624		2.70121	€/kg (2023)	Sweden
74	Country-specific cost projections for renewable hydrogen production through off-grid electricity systems	Janssen, Jacob L.L.C.C.; Weeda, Marcel, Detz, Remko J.; van der Zwaan, Bob	10.1016/j.apenergy.2021.118403	Applied Energy	2022	Forecast	Learning Rate	Electrolysis	N/A	9.97755				7.74118		6.62019		5.77106	€/kg (2023)	Sweden
75	Country-specific cost projections for renewable hydrogen production through off-grid electricity systems	Janssen, Jacob L.L.C.C.; Weeda, Marcel, Detz, Remko J.; van der Zwaan, Bob	10.1016/j.apenergy.2021.118406	Applied Energy	2022	Forecast	Learning Rate	Electrolysis	N/A	3.13291				2.83272		2.62332		2.44154	€/kg (2023)	Norway
76	Country-specific cost projections for renewable hydrogen production through off-grid electricity systems	Janssen, Jacob L.L.C.C.; Weeda, Marcel, Detz, Remko J.; van der Zwaan, Bob	10.1016/j.apenergy.2021.118402	Applied Energy	2022	Forecast	Learning Rate	Electrolysis	N/A	4.25065				3.47012		3.18595		3.03518	€/kg (2023)	Norway
77	Country-specific cost projections for renewable hydrogen production through off-grid electricity systems	Janssen, Jacob L.L.C.C.; Weeda, Marcel, Detz, Remko J.; van der Zwaan, Bob	10.1016/j.apenergy.2021.118410	Applied Energy	2022	Forecast	Learning Rate	Electrolysis	N/A	16.1235				12.297		10.4756		9.13479	€/kg (2023)	Norway
78	Country-specific cost projections for renewable hydrogen production through off-grid electricity systems	Janssen, Jacob L.L.C.C.; Weeda, Marcel, Detz, Remko J.; van der Zwaan, Bob	10.1016/j.apenergy.2021.118404	Applied Energy	2022	Forecast	Learning Rate	Electrolysis	N/A	2.86255				2.58151		2.38004		2.20353	€/kg (2023)	Netherlands
79	Country-specific cost projections for renewable hydrogen production through off-grid electricity systems	Janssen, Jacob L.L.C.C.; Weeda, Marcel, Detz, Remko J.; van der Zwaan, Bob	10.1016/j.apenergy.2021.118400	Applied Energy	2022	Forecast	Learning Rate	Electrolysis	N/A	3.55223				2.90915		2.66547		2.52968	€/kg (2023)	Netherlands
80	Country-specific cost projections for renewable hydrogen production through off-grid electricity systems	Janssen, Jacob L.L.C.C.; Weeda, Marcel, Detz, Remko J.; van der Zwaan, Bob	10.1016/j.apenergy.2021.118419	Applied Energy	2022	Forecast	Learning Rate	Electrolysis	N/A	6.65871				5.16608		4.41796		3.8513	€/kg (2023)	Netherlands
81	Country-specific cost projections for renewable hydrogen production through off-grid electricity systems	Janssen, Jacob L.L.C.C.; Weeda, Marcel, Detz, Remko J.; van der Zwaan, Bob	10.1016/j.apenergy.2021.118398	Applied Energy	2022	Forecast	Learning Rate	Electrolysis	N/A	2.33078				2.10822		1.9536		1.81957	€/kg (2023)	Ireland
82	Country-specific cost projections for renewable hydrogen production through off-grid electricity systems	Janssen, Jacob L.L.C.C.; Weeda, Marcel, Detz, Remko J.; van der Zwaan, Bob	10.1016/j.apenergy.2021.118407	Applied Energy	2022	Forecast	Learning Rate	Electrolysis	N/A	3.88586				3.16793		2.9111		2.77795	€/kg (2023)	Ireland
83	Country-specific cost projections for renewable hydrogen production through off-grid electricity systems	Janssen, Jacob L.L.C.C.; Weeda, Marcel, Detz, Remko J.; van der Zwaan, Bob	10.1016/j.apenergy.2021.118427	Applied Energy	2022	Forecast	Learning Rate	Electrolysis	N/A	9.37373				7.1314		6.07172		5.29479	€/kg (2023)	Ireland
84	Country-specific cost projections for renewable hydrogen production through off-grid electricity systems	Janssen, Jacob L.L.C.C.; Weeda, Marcel, Detz, Remko J.; van der Zwaan, Bob	10.1016/j.apenergy.2021.118401	Applied Energy	2022	Forecast	Learning Rate	Electrolysis	N/A	3.71725				3.35643		3.101		2.87816	€/kg (2023)	Spain
85	Country-specific cost projections for renewable hydrogen production through off-grid electricity systems	Janssen, Jacob L.L.C.C.; Weeda, Marcel, Detz, Remko J.; van der Zwaan, Bob	10.1016/j.apenergy.2021.118428	Applied Energy	2022	Forecast	Learning Rate	Electrolysis	N/A	5.87814				4.80431		4.4076		4.19319	€/kg (2023)	Spain
86	Country-specific cost projections for renewable hydrogen production through off-grid electricity systems	Janssen, Jacob L.L.C.C.; Weeda, Marcel, Detz, Remko J.; van der Zwaan, Bob	10.1016/j.apenergy.2021.118412	Applied Energy	2022	Forecast	Learning Rate	Electrolysis	N/A	4.48499				3.45201		2.94683		2.56923	€/kg (2023)	Spain
87	Country-specific cost projections for renewable hydrogen production through off-grid electricity systems	Janssen, Jacob L.L.C.C.; Weeda, Marcel, Detz, Remko J.; van der Zwaan, Bob	10.1016/j.apenergy.2021.118422	Applied Energy	2022	Forecast	Learning Rate	Electrolysis	N/A	3.03036				2.73999		2.53744		2.36162	€/kg (2023)	United Kingdom
88	Country-specific cost projections for renewable hydrogen production through off-grid electricity systems	Janssen, Jacob L.L.C.C.; Weeda, Marcel, Detz, Remko J.; van der Zwaan, Bob	10.1016/j.apenergy.2021.118413	Applied Energy	2022	Forecast	Learning Rate	Electrolysis	N/A	3.9247				3.20402		2.94164		2.80244	€/kg (2023)	United Kingdom
89	Country-specific cost projections for renewable hydrogen production through off-grid electricity systems	Janssen, Jacob L.L.C.C.; Weeda, Marcel, Detz, Remko J.; van der Zwaan, Bob	10.1016/j.apenergy.2021.118416	Applied Energy	2022	Forecast	Learning Rate	Electrolysis	N/A	8.77607				6.69329		5.70193		4.9721	€/kg (2023)	United Kingdom
90	Decarbonization synergies from joint planning of electricity and hydrogen production: A Texas case study	Bødal, Espen Flo; Mallapragada, Dharik; Botterud, Audun; Korpås, Magnus	10.1016/j.ijhydene.2020.09.127	International Journal of Hydrogen Energy	2020	Case Study	Bottom-Up	SMR										1.10579	€/kg (2023)	USA
91	Decarbonization synergies from joint planning of electricity and hydrogen production: A Texas case study	Bødal, Espen Flo; Mallapragada, Dharik; Botterud, Audun; Korpås, Magnus	10.1016/j.ijhydene.2020.09.127	International Journal of Hydrogen Energy	2020	Case Study	Bottom-Up	Electrolysis	PEM									1.45333	€/kg (2023)	USA
92	Deep decarbonization of the Indian economy: 2050 prospects for wind, solar, and green hydrogen	Song, Shaojie; Lin, Haiyang; Sherman, Peter; Yang, Xi; Chen, Shi; Lu, Xi; Lu, Tianguang; Chen, Xinyu; McElroy, Michael B.	10.1016/j.isci.2022.104399	iScience	2022	Forecast	Bottom-Up	Electrolysis	AE									1.29171	€/kg (2023)	India
93	Designing optimal integrated electricity supply configurations for renewable hydrogen generation in Australia	Ali Khan, Muhammad Haider; Daiyan, Rahman; Han, Zhaojun; Hablutzel, Martin; Haque, Nawshad; Amal, Rose; MacGill, Iain	10.1016/j.isci.2021.102539	iScience	2021	Forecast	Bottom-Up	Electrolysis	AE					4.52842		3.42866			€/kg (2023)	Australia
94	Designing optimal integrated electricity supply configurations for renewable hydrogen generation in Australia	Ali Khan, Muhammad Haider; Daiyan, Rahman; Han, Zhaojun; Hablutzel, Martin; Haque, Nawshad; Amal, Rose; MacGill, Iain	10.1016/j.isci.2021.102539	iScience	2021	Forecast	Bottom-Up	Electrolysis	PEM					5.75756		3.23458			€/kg (2023)	Australia
95	Designing optimal integrated electricity supply configurations for renewable hydrogen generation in Australia	Ali Khan, Muhammad Haider; Daiyan, Rahman; Han, Zhaojun; Hablutzel, Martin; Haque, Nawshad; Amal, Rose; MacGill, Iain	10.1016/j.isci.2021.102539	iScience	2021	Forecast	Bottom-Up	Electrolysis	AE					4.01088		3.23458			€/kg (2023)	Australia
96	Designing optimal integrated electricity supply configurations for renewable hydrogen generation in Australia	Ali Khan, Muhammad Haider; Daiyan, Rahman; Han, Zhaojun; Hablutzel, Martin; Haque, Nawshad; Amal, Rose; MacGill, Iain	10.1016/j.isci.2021.102539	iScience	2021	Forecast	Bottom-Up	Electrolysis	PEM					4.72249		2.97582			€/kg (2023)	Australia
97	Ecological and Economic Evaluation of Hydrogen Production by Different Water Electrolysis Technologies	Tenhumberg, Nils; Büker, Karsten	10.1002/cite.202000090	Chemie Ingenieur Technik	2020	Case Study	Bottom-Up	Electrolysis	PEM & AE & SOEC					7.24182					€/kg (2023)	International
98	Economic analysis of hydrogen production in Germany with a focus on green hydrogen, considering all three major water electrolysis technologies	Gerloff, Niklas	10.1039/D3SE00073G	Sustainable Energy Fuels (Sustainable Energy & Fuels)	2023	Forecast	Bottom-Up/Learning Rate	Electrolysis	AE			13.7833		5.46667				5.35	€/kg (2023)	Germany
99	Economic analysis of hydrogen production in Germany with a focus on green hydrogen, considering all three major water electrolysis technologies	Gerloff, Niklas	10.1039/D3SE00073G	Sustainable Energy Fuels (Sustainable Energy & Fuels)	2023	Forecast	Bottom-Up/Learning Rate	Electrolysis	PEM			13.8067		5.78				5.28	€/kg (2023)	Germany
100	Economic analysis of hydrogen production in Germany with a focus on green hydrogen, considering all three major water electrolysis technologies	Gerloff, Niklas	10.1039/D3SE00073G	Sustainable Energy Fuels (Sustainable Energy & Fuels)	2023	Forecast	Bottom-Up/Learning Rate	Electrolysis	SOEC			12.73		4.57333				4.27333	€/kg (2023)	Germany
101	Economic analysis of hydrogen production in Germany with a focus on green hydrogen, considering all three major water electrolysis technologies	Gerloff, Niklas	10.1039/D3SE00073G	Sustainable Energy Fuels (Sustainable Energy & Fuels)	2023	Forecast	Bottom-Up/Learning Rate	Electrolysis	AE			5		3.72				2.92	€/kg (2023)	Germany
102	Economic analysis of hydrogen production in Germany with a focus on green hydrogen, considering all three major water electrolysis technologies	Gerloff, Niklas	10.1039/D3SE00073G	Sustainable Energy Fuels (Sustainable Energy & Fuels)	2023	Forecast	Bottom-Up/Learning Rate	Electrolysis	PEM			5.18		3.74				2.73	€/kg (2023)	Germany
103	Economic analysis of hydrogen production in Germany with a focus on green hydrogen, considering all three major water electrolysis technologies	Gerloff, Niklas	10.1039/D3SE00073G	Sustainable Energy Fuels (Sustainable Energy & Fuels)	2023	Forecast	Bottom-Up/Learning Rate	Electrolysis	SOEC			5.96		3.27				2.39	€/kg (2023)	Germany
104	Economic analysis of hydrogen production in Germany with a focus on green hydrogen, considering all three major water electrolysis technologies	Gerloff, Niklas	10.1039/D3SE00073G	Sustainable Energy Fuels (Sustainable Energy & Fuels)	2023	Forecast	Bottom-Up/Learning Rate	Electrolysis	AE			13.3667		5.46667				5.15	€/kg (2023)	Germany
105	Economic analysis of hydrogen production in Germany with a focus on green hydrogen, considering all three major water electrolysis technologies	Gerloff, Niklas	10.1039/D3SE00073G	Sustainable Energy Fuels (Sustainable Energy & Fuels)	2023	Forecast	Bottom-Up/Learning Rate	Electrolysis	PEM			14.0833		5.17667				5.19667	€/kg (2023)	Germany
106	Economic analysis of hydrogen production in Germany with a focus on green hydrogen, considering all three major water electrolysis technologies	Gerloff, Niklas	10.1039/D3SE00073G	Sustainable Energy Fuels (Sustainable Energy & Fuels)	2023	Forecast	Bottom-Up/Learning Rate	Electrolysis	SOEC			11.7033		4.13667				4.01667	€/kg (2023)	Germany
107	Economic analysis of hydrogen production in Germany with a focus on green hydrogen, considering all three major water electrolysis technologies	Gerloff, Niklas	10.1039/D3SE00073G	Sustainable Energy Fuels (Sustainable Energy & Fuels)	2023	Forecast	Bottom-Up/Learning Rate	Electrolysis	AE			4.44		3.33				2.65	€/kg (2023)	Germany
108	Economic analysis of hydrogen production in Germany with a focus on green hydrogen, considering all three major water electrolysis technologies	Gerloff, Niklas	10.1039/D3SE00073G	Sustainable Energy Fuels (Sustainable Energy & Fuels)	2023	Forecast	Bottom-Up/Learning Rate	Electrolysis	PEM			4.69		3.38				2.62	€/kg (2023)	Germany
109	Economic analysis of hydrogen production in Germany with a focus on green hydrogen, considering all three major water electrolysis technologies	Gerloff, Niklas	10.1039/D3SE00073G	Sustainable Energy Fuels (Sustainable Energy & Fuels)	2023	Forecast	Bottom-Up/Learning Rate	Electrolysis	SOEC			4.63		2.68				2.04	€/kg (2023)	Germany
110	Economic analysis of hydrogen production in Germany with a focus on green hydrogen, considering all three major water electrolysis technologies	Gerloff, Niklas	10.1039/D3SE00073G	Sustainable Energy Fuels (Sustainable Energy & Fuels)	2023	Forecast	Bottom-Up/Learning Rate	Electrolysis	AE					2.88				1.73	€/kg (2023)	Germany
111	Economic analysis of hydrogen production in Germany with a focus on green hydrogen, considering all three major water electrolysis technologies	Gerloff, Niklas	10.1039/D3SE00073G	Sustainable Energy Fuels (Sustainable Energy & Fuels)	2023	Forecast	Bottom-Up/Learning Rate	Electrolysis	PEM					2.75				1.8	€/kg (2023)	Germany
112	Economic analysis of hydrogen production in Germany with a focus on green hydrogen, considering all three major water electrolysis technologies	Gerloff, Niklas	10.1039/D3SE00073G	Sustainable Energy Fuels (Sustainable Energy & Fuels)	2023	Forecast	Bottom-Up/Learning Rate	Electrolysis	SOEC					2.65				2.06	€/kg (2023)	Germany
113	Economic analysis of hydrogen production in Germany with a focus on green hydrogen, considering all three major water electrolysis technologies	Gerloff, Niklas	10.1039/D3SE00073G	Sustainable Energy Fuels (Sustainable Energy & Fuels)	2023	Forecast	Bottom-Up/Learning Rate	Electrolysis	AE					2.39				1.58	€/kg (2023)	Germany
114	Economic analysis of hydrogen production in Germany with a focus on green hydrogen, considering all three major water electrolysis technologies	Gerloff, Niklas	10.1039/D3SE00073G	Sustainable Energy Fuels (Sustainable Energy & Fuels)	2023	Forecast	Bottom-Up/Learning Rate	Electrolysis	PEM					2.22				1.35	€/kg (2023)	Germany
115	Economic analysis of hydrogen production in Germany with a focus on green hydrogen, considering all three major water electrolysis technologies	Gerloff, Niklas	10.1039/D3SE00073G	Sustainable Energy Fuels (Sustainable Energy & Fuels)	2023	Forecast	Bottom-Up/Learning Rate	Electrolysis	SOEC					2.25				1.4	€/kg (2023)	Germany
116	Economic analysis of hydrogen production in Germany with a focus on green hydrogen, considering all three major water electrolysis technologies	Gerloff, Niklas	10.1039/D3SE00073G	Sustainable Energy Fuels (Sustainable Energy & Fuels)	2023	Forecast	Bottom-Up/Learning Rate	Electrolysis	AE					2.34				1.76	€/kg (2023)	Germany
117	Economic analysis of hydrogen production in Germany with a focus on green hydrogen, considering all three major water electrolysis technologies	Gerloff, Niklas	10.1039/D3SE00073G	Sustainable Energy Fuels (Sustainable Energy & Fuels)	2023	Forecast	Bottom-Up/Learning Rate	Electrolysis	PEM					2.3				1.65	€/kg (2023)	Germany
118	Economic analysis of hydrogen production in Germany with a focus on green hydrogen, considering all three major water electrolysis technologies	Gerloff, Niklas	10.1039/D3SE00073G	Sustainable Energy Fuels (Sustainable Energy & Fuels)	2023	Forecast	Bottom-Up/Learning Rate	Electrolysis	SOEC					1.89				1.33	€/kg (2023)	Germany
119	Economic analysis of hydrogen production in Germany with a focus on green hydrogen, considering all three major water electrolysis technologies	Gerloff, Niklas	10.1039/D3SE00073G	Sustainable Energy Fuels (Sustainable Energy & Fuels)	2023	Forecast	Bottom-Up/Learning Rate	Electrolysis	AE					1.85				1.28	€/kg (2023)	Germany
120	Economic analysis of hydrogen production in Germany with a focus on green hydrogen, considering all three major water electrolysis technologies	Gerloff, Niklas	10.1039/D3SE00073G	Sustainable Energy Fuels (Sustainable Energy & Fuels)	2023	Forecast	Bottom-Up/Learning Rate	Electrolysis	PEM					1.74				1.2	€/kg (2023)	Germany
121	Economic analysis of hydrogen production in Germany with a focus on green hydrogen, considering all three major water electrolysis technologies	Gerloff, Niklas	10.1039/D3SE00073G	Sustainable Energy Fuels (Sustainable Energy & Fuels)	2023	Forecast	Bottom-Up/Learning Rate	Electrolysis	SOEC					1.5				0.95	€/kg (2023)	Germany
122	Economic Analysis of Recently Announced Green Hydrogen Projects in Russia: A Multiple Case Study	Gomonov, Konstantin; Reshenikova, Marina; Ratner, Svetlana	https://doi.org/10.3390/en16104023	Energies	2023	Case Study	Bottom-Up	Electrolysis	PEM & AE									4.508	€/kg (2023)	Russia
123	Economic and environmental sustainability of liquid hydrogen fuel for hypersonic transportation systems	Fusaro, Roberta; Vercella, Valeria; Ferretto, Davide; Viola, Nicole; Steelant, Johan	10.1007/s12567-020-00311-x	CEAS Space Journal	2020	Case Study	Bottom-Up	Electrolysis	PEM	5.42708				5.05992				4.83045	€/kg (2023)	Europe
124	Economic and environmental sustainability of liquid hydrogen fuel for hypersonic transportation systems	Fusaro, Roberta; Vercella, Valeria; Ferretto, Davide; Viola, Nicole; Steelant, Johan	10.1007/s12567-020-00311-x	CEAS Space Journal	2020	Case Study	Bottom-Up	Electrolysis	AE	3.83223				2.38654				1.68664	€/kg (2023)	Europe
125	Economic and environmental sustainability of liquid hydrogen fuel for hypersonic transportation systems	Fusaro, Roberta; Vercella, Valeria; Ferretto, Davide; Viola, Nicole; Steelant, Johan	10.1007/s12567-020-00311-x	CEAS Space Journal	2020	Case Study	Bottom-Up	Electrolysis	PEM	1.3539				1.19327				1.04411	€/kg (2023)	Europe
126	Economic and environmental sustainability of liquid hydrogen fuel for hypersonic transportation systems	Fusaro, Roberta; Vercella, Valeria; Ferretto, Davide; Viola, Nicole; Steelant, Johan	10.1007/s12567-020-00311-x	CEAS Space Journal	2020	Case Study	Bottom-Up	Electrolysis	AE	0.906426				0.539266				0.355686	€/kg (2023)	Europe
127	Economic and environmental sustainability of liquid hydrogen fuel for hypersonic transportation systems	Fusaro, Roberta; Vercella, Valeria; Ferretto, Davide; Viola, Nicole; Steelant, Johan	10.1007/s12567-020-00311-x	CEAS Space Journal	2020	Case Study	Bottom-Up	Electrolysis	PEM & AE	5.09017				3.73418				3.10834	€/kg (2023)	Europe
128	Economic evaluation of hybrid off-shore wind power and hydrogen storage system	Loisel, Rodica; Baranger, Laurent; Chemouri, Nezha; Spinu, Stefania; Pardo, Sophie	10.1016/j.ijhydene.2015.03.117	International Journal of Hydrogen Energy	2015	Case Study	Bottom-Up	Electrolysis	PEM					4.99917					€/kg (2023)	France
129	Economics of converting renewable power to hydrogen	Glenk, Gunther; Reichelstein, Stefan	10.1038/s41560-019-0326-1	Nat Energy (Nature Energy)	2019	Case Study	Learning Rate/Bottom-Up	Electrolysis	PEM & AE	3.21265			2.86844	2.63896					€/kg (2023)	Germany
130	Economics of converting renewable power to hydrogen	Glenk, Gunther; Reichelstein, Stefan	10.1038/s41560-019-0326-1	Nat Energy (Nature Energy)	2019	Case Study	Learning Rate/Bottom-Up	Electrolysis	PEM & AE	3.75278			3.21667	2.78778					€/kg (2023)	USA
131	Economics of converting renewable power to hydrogen	Glenk, Gunther; Reichelstein, Stefan	10.1038/s41560-019-0326-1	Nat Energy (Nature Energy)	2019	Case Study	Learning Rate/Bottom-Up	SMR		2.29475			2.29475	2.29475					€/kg (2023)	Germany
132	Economics of converting renewable power to hydrogen	Glenk, Gunther; Reichelstein, Stefan	10.1038/s41560-019-0326-1	Nat Energy (Nature Energy)	2019	Case Study	Learning Rate/Bottom-Up	SMR		2.57334			2.57334	2.57334					€/kg (2023)	USA
133	Economics of hydrogen production	Dodds, P. E.	10.1016/B978-1-78242-361-4.00003-0	Compendium of Hydrogen Energy 2015	2015	Forecast	Learning Rate	Electrolysis	PEM & AE & SOEC	5.1179				5.91401		5.57282		5.45909	€/kg (2023)	United Kingdom
134	Economics of hydrogen production	Dodds, P. E.	10.1016/B978-1-78242-361-4.00003-0	Compendium of Hydrogen Energy 2015	2015	Forecast	Learning Rate	Coal		1.93343				2.16089		2.04716		1.93343	€/kg (2023)	United Kingdom
135	Economics of hydrogen production	Dodds, P. E.	10.1016/B978-1-78242-361-4.00003-0	Compendium of Hydrogen Energy 2015	2015	Forecast	Learning Rate	Coal + CCS		2.27462				2.38835		2.27462		2.27462	€/kg (2023)	United Kingdom
136	Economics of hydrogen production	Dodds, P. E.	10.1016/B978-1-78242-361-4.00003-0	Compendium of Hydrogen Energy 2015	2015	Forecast	Learning Rate	SMR		2.38835				2.61581		2.50208		2.50208	€/kg (2023)	United Kingdom
137	Economics of hydrogen production	Dodds, P. E.	10.1016/B978-1-78242-361-4.00003-0	Compendium of Hydrogen Energy 2015	2015	Forecast	Learning Rate	SMR + CCS		2.61581				2.72955		2.67268		2.61581	€/kg (2023)	United Kingdom
138	Economics of hydrogen production	Dodds, P. E.	10.1016/B978-1-78242-361-4.00003-0	Compendium of Hydrogen Energy 2015	2015	Forecast	Learning Rate	Biomass Gasification		3.98059				3.98059		3.98059		3.98059	€/kg (2023)	United Kingdom
139	Energy Sustainability and Climate Change in ASEAN	Phoumin, Han; Taghizadeh-Hesary, Farhad; Kimura, Fukunari; Arima, Jun	10.1007/978-981-16-2000-3	Grey Reports & Books	2021	Forecast	Expert Elicitation	Electrolysis	N/A	5.20152				2.3927					€/kg (2023)	International
140	Energy Sustainability and Climate Change in ASEAN	Phoumin, Han; Taghizadeh-Hesary, Farhad; Kimura, Fukunari; Arima, Jun	10.1007/978-981-16-2000-3	Grey Reports & Books	2021	Forecast	Expert Elicitation	SMR + CCS		2.08061				1.3524					€/kg (2023)	International
141	Estimating long-term global supply costs for low-carbon hydrogen	Gregor Brändle, Max Schönfisch, Simon Schulte	https://doi.org/10.1016/j.apenergy.2021.117481	Applied Energy	2020	Forecast	Bottom-Up/Learning Rate	Electrolysis	PEM & AE & SOEC	4.21255				2.84347		2.26425		1.79033	€/kg (2023)	Top 20 RES Regions (Mean)
142	Estimating long-term global supply costs for low-carbon hydrogen	Gregor Brändle, Max Schönfisch, Simon Schulte	https://doi.org/10.1016/j.apenergy.2021.117481	Applied Energy	2020	Forecast	Bottom-Up/Learning Rate	Electrolysis	PEM & AE & SOEC	3.68598				2.73816		2.52753		2.10628	€/kg (2023)	Top 20 RES Regions (Mean)
143	Estimating long-term global supply costs for low-carbon hydrogen	Gregor Brändle, Max Schönfisch, Simon Schulte	https://doi.org/10.1016/j.apenergy.2021.117481	Applied Energy	2020	Forecast	Bottom-Up/Learning Rate	Electrolysis	PEM & AE & SOEC	5.31835				4.42318		3.68598		2.90666	€/kg (2023)	Top 20 RES Regions (Mean)
144	Estimating long-term global supply costs for low-carbon hydrogen	Gregor Brändle, Max Schönfisch, Simon Schulte	https://doi.org/10.1016/j.apenergy.2021.117481	Applied Energy	2020	Forecast	Bottom-Up/Learning Rate	SMR + CCS										1.71135	€/kg (2023)	USA
145	Estimating long-term global supply costs for low-carbon hydrogen	Gregor Brändle, Max Schönfisch, Simon Schulte	https://doi.org/10.1016/j.apenergy.2021.117481	Applied Energy	2020	Forecast	Bottom-Up/Learning Rate	SMR + CCS										2.42222	€/kg (2023)	Europe
146	Estimating long-term global supply costs for low-carbon hydrogen	Gregor Brändle, Max Schönfisch, Simon Schulte	https://doi.org/10.1016/j.apenergy.2021.117484	Applied Energy	2020	Forecast	Bottom-Up/Learning Rate	SMR + CCS										2.76449	€/kg (2023)	Japan
147	Estimating long-term global supply costs for low-carbon hydrogen	Gregor Brändle, Max Schönfisch, Simon Schulte	https://doi.org/10.1016/j.apenergy.2021.117481	Applied Energy	2020	Forecast	Bottom-Up/Learning Rate	SMR + CCS										1.00048	€/kg (2023)	Qatar
148	Estimating long-term global supply costs for low-carbon hydrogen	Gregor Brändle, Max Schönfisch, Simon Schulte	https://doi.org/10.1016/j.apenergy.2021.117481	Applied Energy	2020	Forecast	Bottom-Up/Learning Rate	SMR + CCS										1.26377	€/kg (2023)	Russia
149	Estimating long-term global supply costs for low-carbon hydrogen	Gregor Brändle, Max Schönfisch, Simon Schulte	https://doi.org/10.1016/j.apenergy.2021.117484	Applied Energy	2020	Forecast	Bottom-Up/Learning Rate	Pyrolysis										1.15845	€/kg (2023)	USA
150	Estimating long-term global supply costs for low-carbon hydrogen	Gregor Brändle, Max Schönfisch, Simon Schulte	https://doi.org/10.1016/j.apenergy.2021.117484	Applied Energy	2020	Forecast	Bottom-Up/Learning Rate	Pyrolysis										2.10628	€/kg (2023)	Europe
151	Estimating long-term global supply costs for low-carbon hydrogen	Gregor Brändle, Max Schönfisch, Simon Schulte	https://doi.org/10.1016/j.apenergy.2021.117481	Applied Energy	2020	Forecast	Bottom-Up/Learning Rate	Pyrolysis										2.63284	€/kg (2023)	Japan
152	Estimating long-term global supply costs for low-carbon hydrogen	Gregor Brändle, Max Schönfisch, Simon Schulte	https://doi.org/10.1016/j.apenergy.2021.117481	Applied Energy	2020	Forecast	Bottom-Up/Learning Rate	Pyrolysis										0.421255	€/kg (2023)	Qatar
153	Estimating long-term global supply costs for low-carbon hydrogen	Gregor Brändle, Max Schönfisch, Simon Schulte	https://doi.org/10.1016/j.apenergy.2021.117484	Applied Energy	2020	Forecast	Bottom-Up/Learning Rate	Pyrolysis										0.631883	€/kg (2023)	Russia
157	Estimating long-term global supply costs for low-carbon hydrogen	Gregor Brändle, Max Schönfisch, Simon Schulte	https://doi.org/10.1016/j.apenergy.2021.117481	Applied Energy	2020	Forecast	Bottom-Up/Learning Rate	Electrolysis	PEM & AE & SOEC									2.10628	€/kg (2023)	Spain
158	Estimating long-term global supply costs for low-carbon hydrogen	Gregor Brändle, Max Schönfisch, Simon Schulte	https://doi.org/10.1016/j.apenergy.2021.117484	Applied Energy	2020	Forecast	Bottom-Up/Learning Rate	Electrolysis	PEM & AE & SOEC									3.26473	€/kg (2023)	Morocco
159	Estimating long-term global supply costs for low-carbon hydrogen	Gregor Brändle, Max Schönfisch, Simon Schulte	https://doi.org/10.1016/j.apenergy.2021.117484	Applied Energy	2020	Forecast	Bottom-Up/Learning Rate	Electrolysis	PEM & AE & SOEC									2.42222	€/kg (2023)	Germany
160	Estimating long-term global supply costs for low-carbon hydrogen	Gregor Brändle, Max Schönfisch, Simon Schulte	https://doi.org/10.1016/j.apenergy.2021.117481	Applied Energy	2020	Forecast	Bottom-Up/Learning Rate	Electrolysis	PEM & AE & SOEC									1.94831	€/kg (2023)	Norway
161	Estimating long-term global supply costs for low-carbon hydrogen	Gregor Brändle, Max Schönfisch, Simon Schulte	https://doi.org/10.1016/j.apenergy.2021.117484	Applied Energy	2020	Forecast	Bottom-Up/Learning Rate	Electrolysis	PEM & AE & SOEC									1.79033	€/kg (2023)	Saudi Arabia
162	Estimating long-term global supply costs for low-carbon hydrogen	Gregor Brändle, Max Schönfisch, Simon Schulte	https://doi.org/10.1016/j.apenergy.2021.117481	Applied Energy	2020	Forecast	Bottom-Up/Learning Rate	SMR + CCS										2.21159	€/kg (2023)	Germany
163	Estimating long-term global supply costs for low-carbon hydrogen	Gregor Brändle, Max Schönfisch, Simon Schulte	https://doi.org/10.1016/j.apenergy.2021.117481	Applied Energy	2020	Forecast	Bottom-Up/Learning Rate	Pyrolysis										2.10628	€/kg (2023)	Germany
164	Estimating long-term global supply costs for low-carbon hydrogen	Gregor Brändle, Max Schönfisch, Simon Schulte	https://doi.org/10.1016/j.apenergy.2021.117484	Applied Energy	2020	Forecast	Bottom-Up/Learning Rate	Electrolysis	PEM & AE & SOEC									3.37004	€/kg (2023)	Japan
165	Estimating long-term global supply costs for low-carbon hydrogen	Gregor Brändle, Max Schönfisch, Simon Schulte	https://doi.org/10.1016/j.apenergy.2021.117484	Applied Energy	2020	Forecast	Bottom-Up/Learning Rate	Electrolysis	PEM & AE & SOEC									1.68502	€/kg (2023)	Oman
169	Flexible sector coupling with hydrogen: A climate-friendly fuel supply for road transport	Emonts, Bernd; Reuß, Markus; Stenzel, Peter; Welder, Lara; Knicker, Felix; Grube, Thomas; Görner, Klaus; Robinius, Martin; Stolten, Detlef	10.1016/j.ijhydene.2019.03.183	International Journal of Hydrogen Energy	2019	Mobility	Bottom-Up	Electrolysis	PEM									4.40592	€/kg (2023)	Germany
170	Forecasting Development of Green Hydrogen Production Technologies Using Component-Based Learning Curves	Revinova, Svetlana; Lazanyuk, Inna; Ratner, Svetlana; Gomonov, Konstantin	10.3390/en16114338	Energies	2023	Forecast	Learning Rate	Electrolysis	PEM & AE & SOEC					2.668					€/kg (2023)	International
171	Forecasting renewable hydrogen production technology shares under cost uncertainty	Lane, Blake; Reed, Jeffrey; Shaffer, Brendan; Scott, Samuelsen	https://doi.org/10.1016/j.ijhydene.2021.06.012	International Journal of Hydrogen Energy	2021	Forecast	Learning Rate	Biomass Gasification										0.969564	€/kg (2023)	USA
172	Forecasting renewable hydrogen production technology shares under cost uncertainty	Lane, Blake; Reed, Jeffrey; Shaffer, Brendan; Scott, Samuelsen	https://doi.org/10.1016/j.ijhydene.2021.06.012	International Journal of Hydrogen Energy	2021	Forecast	Learning Rate	Electrolysis	PEM									10.4967	€/kg (2023)	USA
173	Future costs of fuel cell electric vehicles in California using a learning rate approach	Ruffini, Eleonora; Wie, Max	10.1016/j.energy.2018.02.071	Energy	2018	Case Study	Learning Rate	SMR		4.94286				4.39365		4.39365		4.39365	€/kg (2023)	USA
174	Future costs of fuel cell electric vehicles in California using a learning rate approach	Ruffini, Eleonora; Wie, Max	10.1016/j.energy.2018.02.071	Energy	2018	Case Study	Learning Rate	Electrolysis	N/A	9.33651				8.34794		8.34794		8.34794	€/kg (2023)	USA
175	Gas Transition: Renewable Hydrogen’s Future in Eastern Australia’s Energy Networks	Gurieff, Nicholas; Moghtaderi, Behdad; Daiyan, Rahman; Amal, Rose	10.3390/en14133968	Energies	2021	Forecast	Bottom-Up	Electrolysis	PEM	5.36941				1.68198		1.09976		0.905683	€/kg (2023)	Australia
176	Gas Transition: Renewable Hydrogen’s Future in Eastern Australia’s Energy Networks	Gurieff, Nicholas; Moghtaderi, Behdad; Daiyan, Rahman; Amal, Rose	10.3390/en14133968	Energies	2021	Forecast	Bottom-Up	Electrolysis	PEM	4.36669				1.94075		1.45556		1.29383	€/kg (2023)	Australia
177	GIS-based method for future prospect of hydrogen demand in the Algerian road transport sector	Rahmouni, Soumia; Settou, Noureddine; Negrou, Belkhir; Gouareh, Abderrahmane	10.1016/j.ijhydene.2015.11.156	International Journal of Hydrogen Energy	2016	Forecast	Bottom-Up	Electrolysis	N/A	6.1342			3.1807	1.41995		1.13596	1.07916		€/kg (2023)	Algeria
178	GIS-based method for future prospect of hydrogen demand in the Algerian road transport sector	Rahmouni, Soumia; Settou, Noureddine; Negrou, Belkhir; Gouareh, Abderrahmane	10.1016/j.ijhydene.2015.11.157	International Journal of Hydrogen Energy	2016	Forecast	Bottom-Up	Electrolysis	N/A	5.74797			4.65745	4.31666		4.10083	4.05539		€/kg (2023)	Algeria
179	Global Hydrogen Review 2022	IEA	https://www.iea.org/reports/global-hydrogen-review-2022	Grey Reports & Books	2022	Forecast	Expert Elicitation	SMR + CCS			2.43438			1.49044		1.51528			€/kg (2023)	International
180	Global Hydrogen Review 2022	IEA	https://www.iea.org/reports/global-hydrogen-review-2023	Grey Reports & Books	2022	Forecast	Expert Elicitation	Coal + CCS			2.48406			1.83821		1.88789			€/kg (2023)	International
181	Global Hydrogen Review 2022	IEA	https://www.iea.org/reports/global-hydrogen-review-2024	Grey Reports & Books	2022	Forecast	Expert Elicitation	Electrolysis	N/A		5.88723			3.08024		2.73247			€/kg (2023)	International
182	Global Hydrogen Review 2022	IEA	https://www.iea.org/reports/global-hydrogen-review-2024	Grey Reports & Books	2022	Forecast	Expert Elicitation	Electrolysis	N/A		6.75666			3.47769		2.23566			€/kg (2023)	International
183	Global Hydrogen Review 2022	IEA	https://www.iea.org/reports/global-hydrogen-review-2025	Grey Reports & Books	2022	Forecast	Expert Elicitation	Electrolysis	N/A		6.21016			2.73247		1.98725			€/kg (2023)	International
184	Global Hydrogen Review 2022	IEA	https://www.iea.org/reports/global-hydrogen-review-2026	Grey Reports & Books	2022	Forecast	Expert Elicitation	Electrolysis	N/A		5.34074			4.27259		3.87514			€/kg (2023)	International
185	Global Hydrogen Review 2022	IEA	https://www.iea.org/reports/global-hydrogen-review-2026	Grey Reports & Books	2022	Forecast	Expert Elicitation	Electrolysis	N/A			4.27259							€/kg (2023)	Europe
186	Global Hydrogen Review 2022	IEA	https://www.iea.org/reports/global-hydrogen-review-2026	Grey Reports & Books	2022	Forecast	Expert Elicitation	Electrolysis	N/A			3.27897							€/kg (2023)	Middle East
187	Global Hydrogen Review 2022	IEA	https://www.iea.org/reports/global-hydrogen-review-2026	Grey Reports & Books	2022	Forecast	Expert Elicitation	Electrolysis	N/A			2.98088							€/kg (2023)	China
188	Green hydrogen production costs in Australia: implications of renewable energy and electrolyser costs	Thomas Longden, Frank Jotzo, Mousami Prasad, Richard Andrews			2020	Forecast	Expert Elicitation	Electrolysis	PEM & AE					2.94879					€/kg (2023)	Australia
189	Green hydrogen production costs in Australia: implications of renewable energy and electrolyser costs	Thomas Longden, Frank Jotzo, Mousami Prasad, Richard Andrews			2020	Forecast	Expert Elicitation	Electrolysis	PEM & AE					2.54859					€/kg (2023)	Australia
190	Greenhouse gas reduction potential and cost-effectiveness of economy-wide hydrogen-natural gas blending for energy end uses	Davis, M.; Okunlola, A.; Di Lullo, G.; Giwa, T.; Kumar, A.	10.1016/j.rser.2022.112962	Renewable and Sustainable Energy Reviews	2023	Forecast	Bottom-Up/Learning Rate	SMR						0.884		1.088		1.224	€/kg (2023)	Canada
191	Greenhouse gas reduction potential and cost-effectiveness of economy-wide hydrogen-natural gas blending for energy end uses	Davis, M.; Okunlola, A.; Di Lullo, G.; Giwa, T.; Kumar, A.	10.1016/j.rser.2022.112964	Renewable and Sustainable Energy Reviews	2023	Forecast	Bottom-Up/Learning Rate	SMR + CCS						1.241		1.394		1.428	€/kg (2023)	Canada
192	Greenhouse gas reduction potential and cost-effectiveness of economy-wide hydrogen-natural gas blending for energy end uses	Davis, M.; Okunlola, A.; Di Lullo, G.; Giwa, T.; Kumar, A.	10.1016/j.rser.2022.112965	Renewable and Sustainable Energy Reviews	2023	Forecast	Bottom-Up/Learning Rate	Autothermal Reforming						1.02		1.19		1.292	€/kg (2023)	Canada
193	Greenhouse gas reduction potential and cost-effectiveness of economy-wide hydrogen-natural gas blending for energy end uses	Davis, M.; Okunlola, A.; Di Lullo, G.; Giwa, T.; Kumar, A.	10.1016/j.rser.2022.112963	Renewable and Sustainable Energy Reviews	2023	Forecast	Bottom-Up/Learning Rate	Autothermal Reforming + CCS						1.258		1.36		1.394	€/kg (2023)	Canada
194	Greenhouse gas reduction potential and cost-effectiveness of economy-wide hydrogen-natural gas blending for energy end uses	Davis, M.; Okunlola, A.; Di Lullo, G.; Giwa, T.; Kumar, A.	10.1016/j.rser.2022.112965	Renewable and Sustainable Energy Reviews	2023	Forecast	Bottom-Up/Learning Rate	Chemical Looping Partial Oxidation of Methane						1.904		2.04		2.108	€/kg (2023)	Canada
195	Greenhouse gas reduction potential and cost-effectiveness of economy-wide hydrogen-natural gas blending for energy end uses	Davis, M.; Okunlola, A.; Di Lullo, G.; Giwa, T.; Kumar, A.	10.1016/j.rser.2022.112965	Renewable and Sustainable Energy Reviews	2023	Forecast	Bottom-Up/Learning Rate	Chemical Looping Partial Oxidation of Methane + CCS						2.04		2.108		2.142	€/kg (2023)	Canada
196	Greenhouse gas reduction potential and cost-effectiveness of economy-wide hydrogen-natural gas blending for energy end uses	Davis, M.; Okunlola, A.; Di Lullo, G.; Giwa, T.; Kumar, A.	10.1016/j.rser.2022.112968	Renewable and Sustainable Energy Reviews	2023	Forecast	Bottom-Up/Learning Rate	Natural Gas Decomposition						1.292		1.462		1.632	€/kg (2023)	Canada
197	Greenhouse gas reduction potential and cost-effectiveness of economy-wide hydrogen-natural gas blending for energy end uses	Davis, M.; Okunlola, A.; Di Lullo, G.; Giwa, T.; Kumar, A.	10.1016/j.rser.2022.112962	Renewable and Sustainable Energy Reviews	2023	Forecast	Bottom-Up/Learning Rate	Natural Gas Decomposition + CCS						1.496		1.632		1.7	€/kg (2023)	Canada
198	Greenhouse gas reduction potential and cost-effectiveness of economy-wide hydrogen-natural gas blending for energy end uses	Davis, M.; Okunlola, A.; Di Lullo, G.; Giwa, T.; Kumar, A.	10.1016/j.rser.2022.112963	Renewable and Sustainable Energy Reviews	2023	Forecast	Bottom-Up/Learning Rate	Electrolysis	N/A					3.706		3.876		4.012	€/kg (2023)	Canada
199	Greenhouse gas reduction potential and cost-effectiveness of economy-wide hydrogen-natural gas blending for energy end uses	Davis, M.; Okunlola, A.; Di Lullo, G.; Giwa, T.; Kumar, A.	10.1016/j.rser.2022.112964	Renewable and Sustainable Energy Reviews	2023	Forecast	Bottom-Up/Learning Rate	Electrolysis	N/A					3.774		3.672		3.468	€/kg (2023)	Canada
200	Greenhouse gas reduction potential and cost-effectiveness of economy-wide hydrogen-natural gas blending for energy end uses	Davis, M.; Okunlola, A.; Di Lullo, G.; Giwa, T.; Kumar, A.	10.1016/j.rser.2022.112969	Renewable and Sustainable Energy Reviews	2023	Forecast	Bottom-Up/Learning Rate	Electrolysis	N/A					3.4		3.264		3.128	€/kg (2023)	Canada
201	Greenhouse gas reduction potential and cost-effectiveness of economy-wide hydrogen-natural gas blending for energy end uses	Davis, M.; Okunlola, A.; Di Lullo, G.; Giwa, T.; Kumar, A.	10.1016/j.rser.2022.112968	Renewable and Sustainable Energy Reviews	2023	Forecast	Bottom-Up/Learning Rate	SMR						1.224		1.428		1.632	€/kg (2023)	Canada
202	Greenhouse gas reduction potential and cost-effectiveness of economy-wide hydrogen-natural gas blending for energy end uses	Davis, M.; Okunlola, A.; Di Lullo, G.; Giwa, T.; Kumar, A.	10.1016/j.rser.2022.112969	Renewable and Sustainable Energy Reviews	2023	Forecast	Bottom-Up/Learning Rate	SMR + CCS						1.428		1.547		1.632	€/kg (2023)	Canada
203	Greenhouse gas reduction potential and cost-effectiveness of economy-wide hydrogen-natural gas blending for energy end uses	Davis, M.; Okunlola, A.; Di Lullo, G.; Giwa, T.; Kumar, A.	10.1016/j.rser.2022.112968	Renewable and Sustainable Energy Reviews	2023	Forecast	Bottom-Up/Learning Rate	Autothermal Reforming						1.36		1.564		1.666	€/kg (2023)	Canada
204	Greenhouse gas reduction potential and cost-effectiveness of economy-wide hydrogen-natural gas blending for energy end uses	Davis, M.; Okunlola, A.; Di Lullo, G.; Giwa, T.; Kumar, A.	10.1016/j.rser.2022.112969	Renewable and Sustainable Energy Reviews	2023	Forecast	Bottom-Up/Learning Rate	Autothermal Reforming + CCS						1.36		1.462		1.462	€/kg (2023)	Canada
205	Greenhouse gas reduction potential and cost-effectiveness of economy-wide hydrogen-natural gas blending for energy end uses	Davis, M.; Okunlola, A.; Di Lullo, G.; Giwa, T.; Kumar, A.	10.1016/j.rser.2022.112963	Renewable and Sustainable Energy Reviews	2023	Forecast	Bottom-Up/Learning Rate	Chemical Looping Partial Oxidation of Methane						2.176		2.278		2.38	€/kg (2023)	Canada
206	Greenhouse gas reduction potential and cost-effectiveness of economy-wide hydrogen-natural gas blending for energy end uses	Davis, M.; Okunlola, A.; Di Lullo, G.; Giwa, T.; Kumar, A.	10.1016/j.rser.2022.112966	Renewable and Sustainable Energy Reviews	2023	Forecast	Bottom-Up/Learning Rate	Chemical Looping Partial Oxidation of Methane + CCS						2.108		2.21		2.244	€/kg (2023)	Canada
207	Greenhouse gas reduction potential and cost-effectiveness of economy-wide hydrogen-natural gas blending for energy end uses	Davis, M.; Okunlola, A.; Di Lullo, G.; Giwa, T.; Kumar, A.	10.1016/j.rser.2022.112967	Renewable and Sustainable Energy Reviews	2023	Forecast	Bottom-Up/Learning Rate	Natural Gas Decomposition						1.428		1.632		1.734	€/kg (2023)	Canada
208	Greenhouse gas reduction potential and cost-effectiveness of economy-wide hydrogen-natural gas blending for energy end uses	Davis, M.; Okunlola, A.; Di Lullo, G.; Giwa, T.; Kumar, A.	10.1016/j.rser.2022.112964	Renewable and Sustainable Energy Reviews	2023	Forecast	Bottom-Up/Learning Rate	Natural Gas Decomposition + CCS						1.598		1.7		1.802	€/kg (2023)	Canada
209	Greenhouse gas reduction potential and cost-effectiveness of economy-wide hydrogen-natural gas blending for energy end uses	Davis, M.; Okunlola, A.; Di Lullo, G.; Giwa, T.; Kumar, A.	10.1016/j.rser.2022.112967	Renewable and Sustainable Energy Reviews	2023	Forecast	Bottom-Up/Learning Rate	Electrolysis	N/A					4.114		4.012		4.08	€/kg (2023)	Canada
210	Greenhouse gas reduction potential and cost-effectiveness of economy-wide hydrogen-natural gas blending for energy end uses	Davis, M.; Okunlola, A.; Di Lullo, G.; Giwa, T.; Kumar, A.	10.1016/j.rser.2022.112962	Renewable and Sustainable Energy Reviews	2023	Forecast	Bottom-Up/Learning Rate	Electrolysis	N/A					3.774		3.672		3.468	€/kg (2023)	Canada
211	Greenhouse gas reduction potential and cost-effectiveness of economy-wide hydrogen-natural gas blending for energy end uses	Davis, M.; Okunlola, A.; Di Lullo, G.; Giwa, T.; Kumar, A.	10.1016/j.rser.2022.112967	Renewable and Sustainable Energy Reviews	2023	Forecast	Bottom-Up/Learning Rate	Electrolysis	N/A					3.4		3.264		3.128	€/kg (2023)	Canada
212	Greenhouse gas reduction potential and cost-effectiveness of economy-wide hydrogen-natural gas blending for energy end uses	Davis, M.; Okunlola, A.; Di Lullo, G.; Giwa, T.; Kumar, A.	10.1016/j.rser.2022.112966	Renewable and Sustainable Energy Reviews	2023	Forecast	Bottom-Up/Learning Rate	SMR						1.836		2.04		2.244	€/kg (2023)	Canada
213	Greenhouse gas reduction potential and cost-effectiveness of economy-wide hydrogen-natural gas blending for energy end uses	Davis, M.; Okunlola, A.; Di Lullo, G.; Giwa, T.; Kumar, A.	10.1016/j.rser.2022.112966	Renewable and Sustainable Energy Reviews	2023	Forecast	Bottom-Up/Learning Rate	SMR + CCS						1.734		1.802		1.904	€/kg (2023)	Canada
214	Greenhouse gas reduction potential and cost-effectiveness of economy-wide hydrogen-natural gas blending for energy end uses	Davis, M.; Okunlola, A.; Di Lullo, G.; Giwa, T.; Kumar, A.	10.1016/j.rser.2022.112970	Renewable and Sustainable Energy Reviews	2023	Forecast	Bottom-Up/Learning Rate	Autothermal Reforming						1.938		2.074		2.21	€/kg (2023)	Canada
215	Greenhouse gas reduction potential and cost-effectiveness of economy-wide hydrogen-natural gas blending for energy end uses	Davis, M.; Okunlola, A.; Di Lullo, G.; Giwa, T.; Kumar, A.	10.1016/j.rser.2022.112970	Renewable and Sustainable Energy Reviews	2023	Forecast	Bottom-Up/Learning Rate	Autothermal Reforming + CCS						1.428		1.496		1.564	€/kg (2023)	Canada
216	Greenhouse gas reduction potential and cost-effectiveness of economy-wide hydrogen-natural gas blending for energy end uses	Davis, M.; Okunlola, A.; Di Lullo, G.; Giwa, T.; Kumar, A.	10.1016/j.rser.2022.112970	Renewable and Sustainable Energy Reviews	2023	Forecast	Bottom-Up/Learning Rate	Chemical Looping Partial Oxidation of Methane						2.652		2.822		2.924	€/kg (2023)	Canada
217	Greenhouse gas reduction potential and cost-effectiveness of economy-wide hydrogen-natural gas blending for energy end uses	Davis, M.; Okunlola, A.; Di Lullo, G.; Giwa, T.; Kumar, A.	10.1016/j.rser.2022.112969	Renewable and Sustainable Energy Reviews	2023	Forecast	Bottom-Up/Learning Rate	Chemical Looping Partial Oxidation of Methane + CCS						2.21		2.278		2.278	€/kg (2023)	Canada
218	Greenhouse gas reduction potential and cost-effectiveness of economy-wide hydrogen-natural gas blending for energy end uses	Davis, M.; Okunlola, A.; Di Lullo, G.; Giwa, T.; Kumar, A.	10.1016/j.rser.2022.112969	Renewable and Sustainable Energy Reviews	2023	Forecast	Bottom-Up/Learning Rate	Natural Gas Decomposition						1.632		1.768		1.836	€/kg (2023)	Canada
219	Greenhouse gas reduction potential and cost-effectiveness of economy-wide hydrogen-natural gas blending for energy end uses	Davis, M.; Okunlola, A.; Di Lullo, G.; Giwa, T.; Kumar, A.	10.1016/j.rser.2022.112969	Renewable and Sustainable Energy Reviews	2023	Forecast	Bottom-Up/Learning Rate	Natural Gas Decomposition + CCS						1.7		1.802		1.836	€/kg (2023)	Canada
220	Greenhouse gas reduction potential and cost-effectiveness of economy-wide hydrogen-natural gas blending for energy end uses	Davis, M.; Okunlola, A.; Di Lullo, G.; Giwa, T.; Kumar, A.	10.1016/j.rser.2022.112968	Renewable and Sustainable Energy Reviews	2023	Forecast	Bottom-Up/Learning Rate	Electrolysis	N/A					4.25		4.148		4.148	€/kg (2023)	Canada
221	Greenhouse gas reduction potential and cost-effectiveness of economy-wide hydrogen-natural gas blending for energy end uses	Davis, M.; Okunlola, A.; Di Lullo, G.; Giwa, T.; Kumar, A.	10.1016/j.rser.2022.112968	Renewable and Sustainable Energy Reviews	2023	Forecast	Bottom-Up/Learning Rate	Electrolysis	N/A					3.774		3.672		3.468	€/kg (2023)	Canada
222	Greenhouse gas reduction potential and cost-effectiveness of economy-wide hydrogen-natural gas blending for energy end uses	Davis, M.; Okunlola, A.; Di Lullo, G.; Giwa, T.; Kumar, A.	10.1016/j.rser.2022.112968	Renewable and Sustainable Energy Reviews	2023	Forecast	Bottom-Up/Learning Rate	Electrolysis	N/A					3.4		3.264		3.128	€/kg (2023)	Canada
223	How hydrogen empowers the energy transition	Hydrogen Council		Grey Reports & Books	2017	Forecast	Expert Elicitation	Electrolysis	N/A									3.56015	€/kg (2023)	International
224	Hydrogen for buses in London: A scenario analysis of changes over time in refuelling infrastructure costs	Shayegan, S.; Pearson, P.J.G.; Hart, D.	10.1016/j.ijhydene.2009.06.084	International Journal of Hydrogen Energy	2009	Mobility	Learning Rate	SMR		4.90663			4.08886						€/kg (2023)	United Kingdom
225	Hydrogen for buses in London: A scenario analysis of changes over time in refuelling infrastructure costs	Shayegan, S.; Pearson, P.J.G.; Hart, D.	10.1016/j.ijhydene.2009.06.085	International Journal of Hydrogen Energy	2009	Mobility	Learning Rate	Electrolysis	AE	9.81326			8.99549						€/kg (2023)	United Kingdom
226	Hydrogen Insights	Hydrogen Council; McKinsey & Company		Grey Reports & Books	2021	Forecast	Bottom-Up	SMR		1.50844			1.50844	1.50844	1.50844	1.50844	1.50844	1.50844	€/kg (2023)	International
227	Hydrogen Insights	Hydrogen Council; McKinsey & Company		Grey Reports & Books	2021	Forecast	Bottom-Up	SMR + CCS					2.08061	1.76852	1.7165	1.66449	1.7165	1.56046	€/kg (2023)	International
232	Hydrogen Insights	Hydrogen Council; McKinsey & Company		Grey Reports & Books	2021	Forecast	Bottom-Up/Learning Rate	Electrolysis	N/A	5.61765				2.3927		1.76852		1.56046	€/kg (2023)	International
233	Hydrogen refueling station networks for heavy-duty vehicles in future power systems	Rose, Philipp K.; Neumann, Fabian	10.1016/j.trd.2020.102358	Transportation Research Part D: Transport and Environment	2020	Mobility	Bottom-Up	Electrolysis	N/A									5.76516	€/kg (2023)	Germany
234	Hydrogen supply chain optimization for deployment scenarios in the Midi-Pyrénées region, France	De-León Almaraz, Sofía; Azzaro-Pantel, Catherine; Montastruc, Ludovic; Domenech, Serge	10.1016/j.ijhydene.2014.05.165	International Journal of Hydrogen Energy	2014	Mobility	Bottom-Up/Learning Rate	Electrolysis	N/A	27.0448				12.4822		8.32147		7.74359	€/kg (2023)	France
235	Hydrogen: A renewable energy perspective	Hanley, Emma S.; Deane, J. P.; Gallachóir, B. Ó. P.	10.1016/j.rser.2017.10.034	Renewable and Sustainable Energy Reviews	2018	Forecast	Expert Elicitation	Electrolysis	N/A									2.33606	€/kg (2023)	International
236	Hydrogen: A renewable energy perspective	Hanley, Emma S.; Deane, J. P.; Gallachóir, B. Ó. P.	10.1016/j.rser.2017.10.034	Renewable and Sustainable Energy Reviews	2018	Forecast	Expert Elicitation	Electrolysis	N/A									1.46003	€/kg (2023)	International
237	Impact of international transportation chains on cost of green e-hydrogen: Global cost of hydrogen and consequences for Germany and Finland	Galimova, Tansu; Fasihi, Mahdi; Bogdanov, Dmitrii; Breyer, Christian	10.1016/j.apenergy.2023.121369	Applied Energy	2023	Global Trade	Bottom-Up	Electrolysis	AE	2.9997				1.93314		1.59984		1.43319	€/kg (2023)	Germany
238	Impact of international transportation chains on cost of green e-hydrogen: Global cost of hydrogen and consequences for Germany and Finland	Galimova, Tansu; Fasihi, Mahdi; Bogdanov, Dmitrii; Breyer, Christian	10.1016/j.apenergy.2023.121369	Applied Energy	2023	Global Trade	Bottom-Up	Electrolysis	AE	2.9997				1.9998		1.68317		1.59984	€/kg (2023)	Finnland
239	Impact of international transportation chains on cost of green e-hydrogen: Global cost of hydrogen and consequences for Germany and Finland	Galimova, Tansu; Fasihi, Mahdi; Bogdanov, Dmitrii; Breyer, Christian	10.1016/j.apenergy.2023.121369	Applied Energy	2023	Global Trade	Bottom-Up	Electrolysis	AE	3.39966				1.76649		1.36653		1.23321	€/kg (2023)	Morocco
240	Impact of international transportation chains on cost of green e-hydrogen: Global cost of hydrogen and consequences for Germany and Finland	Galimova, Tansu; Fasihi, Mahdi; Bogdanov, Dmitrii; Breyer, Christian	10.1016/j.apenergy.2023.121369	Applied Energy	2023	Global Trade	Bottom-Up	Electrolysis	AE	2.6664				1.59984		1.26654		1.03323	€/kg (2023)	Chile
257	Integrated electricity, hydrogen and methane system modelling framework: Application to the Dutch Infrastructure Outlook 2050	Koirala, Binod; Hers, Sebastiaan; Morales-España, Germán; Özdemir, Özge; Sijm, Jos; Weeda, Marcel	10.1016/j.apenergy.2021.116713	Applied Energy	2021	Case Study	Bottom-Up	Mix (NG, Biomass, Electrolysis) (+ CCS)	N/A									2.35947	€/kg (2023)	Netherlands
258	Interlinking the Renewable Electricity and Gas Sectors: A Techno-Economic Case Study for Austria	Sejkora, Christoph; Lindorfer, Johannes; Kühberger, Lisa; Kienberger, Thomas	10.3390/en14196289	Energies	2021	Case Study	Learning Rate	Electrolysis	PEM					6.64088		4.42725		3.76316	€/kg (2023)	Austria
259	Is blue hydrogen a bridging technology? - The limits of a CO2 price and the role of state-induced price components for green hydrogen production in Germany	George, Jan Frederick; Müller, Viktor Paul; Winkler, Jenny; Ragwitz, Mario	10.1016/j.enpol.2022.113072	Energy Policy	2022	Forecast	Bottom-Up/Learning Rate	Electrolysis	PEM & AE	8.0808			7.8624	7.7532		7.4256		6.9888	€/kg (2023)	Germany
260	Is blue hydrogen a bridging technology? - The limits of a CO2 price and the role of state-induced price components for green hydrogen production in Germany	George, Jan Frederick; Müller, Viktor Paul; Winkler, Jenny; Ragwitz, Mario	10.1016/j.enpol.2022.113072	Energy Policy	2022	Forecast	Bottom-Up/Learning Rate	SMR		1.3104			1.5288	1.8564		1.9656		2.0748	€/kg (2023)	Germany
261	Is blue hydrogen a bridging technology? - The limits of a CO2 price and the role of state-induced price components for green hydrogen production in Germany	George, Jan Frederick; Müller, Viktor Paul; Winkler, Jenny; Ragwitz, Mario	10.1016/j.enpol.2022.113072	Energy Policy	2022	Forecast	Bottom-Up/Learning Rate	SMR + CCS		1.9656			2.0748	2.2386		2.5116		2.73	€/kg (2023)	Germany
262	Klimaneutrales Deutschland 2045	Agora		Grey Reports & Books	2021	Forecast	Bottom-Up/Learning Rate	Electrolysis	N/A	6.29191				5.16836		4.64403		4.38187	€/kg (2023)	Germany
263	Klimaneutrales Deutschland 2045	Agora		Grey Reports & Books	2021	Forecast	Bottom-Up/Learning Rate	Electrolysis	N/A	6.29191				5.16836		4.64403		4.38187	€/kg (2023)	MENA
264	Large-scale hydrogen production via water electrolysis: a techno-economic and environmental assessment	Terlouw, Tom; Bauer, Christian; McKenna, Russell; Mazzotti, Marco	10.1039/D2EE01023B	Energy Environ. Sci. (Energy & Environmental Science)	2022	Case Study	Bottom-Up	Electrolysis	PEM			13.1914				5.43816			€/kg (2023)	Europe
265	Large-scale hydrogen production via water electrolysis: a techno-economic and environmental assessment	Terlouw, Tom; Bauer, Christian; McKenna, Russell; Mazzotti, Marco	10.1039/D2EE01023B	Energy Environ. Sci. (Energy & Environmental Science)	2022	Case Study	Bottom-Up	Electrolysis	PEM			4.52088				3.01392			€/kg (2023)	Europe
266	Large-scale hydrogen production via water electrolysis: a techno-economic and environmental assessment	Terlouw, Tom; Bauer, Christian; McKenna, Russell; Mazzotti, Marco	10.1039/D2EE01023B	Energy Environ. Sci. (Energy & Environmental Science)	2022	Case Study	Bottom-Up	Electrolysis	PEM			4.63008				3.99672			€/kg (2023)	Europe
268	Low Carbon Scenario Analysis of a Hydrogen-Based Energy Transition for On-Road Transportation in California	Vijayakumar, Vishnu; Jenn, Alan; Fulton, Lewis	10.3390/en14217163	Energies	2021	Mobility	Learning Rate	Electrolysis	PEM				6.55392	5.40959		2.75681		1.24837	€/kg (2023)	USA
269	Low Carbon Scenario Analysis of a Hydrogen-Based Energy Transition for On-Road Transportation in California	Vijayakumar, Vishnu; Jenn, Alan; Fulton, Lewis	10.3390/en14217164	Energies	2021	Mobility	Learning Rate	Electrolysis	PEM				7.07407	5.98175		3.43301		1.97658	€/kg (2023)	USA
270	Low Carbon Scenario Analysis of a Hydrogen-Based Energy Transition for On-Road Transportation in California	Vijayakumar, Vishnu; Jenn, Alan; Fulton, Lewis	10.3390/en14217167	Energies	2021	Mobility	Learning Rate	SMR + CCS					2.28867	2.34069		2.28867		2.18464	€/kg (2023)	USA
271	Low Carbon Scenario Analysis of a Hydrogen-Based Energy Transition for On-Road Transportation in California	Vijayakumar, Vishnu; Jenn, Alan; Fulton, Lewis	10.3390/en14217168	Energies	2021	Mobility	Learning Rate	SMR + CCS					2.08061	2.13263		2.15863		2.18464	€/kg (2023)	USA
272	Materializing International Trade of Decarbonized Hydrogen Through Optimization in Both Economic and Environmental Aspects	Kim, Ayeon; Kim, Heehyang; Lim, Dongjun; Cheon, Seunghyun; Lim, Hankwon	10.1021/acssuschemeng.2c05024	ACS Sustainable Chem. Eng. (ACS Sustainable Chemistry & Engineering)	2023	Global Trade	Historic Data Regression	Electrolysis	PEM					1.8676					€/kg (2023)	South Africa
273	Materializing International Trade of Decarbonized Hydrogen Through Optimization in Both Economic and Environmental Aspects	Kim, Ayeon; Kim, Heehyang; Lim, Dongjun; Cheon, Seunghyun; Lim, Hankwon	10.1021/acssuschemeng.2c05025	ACS Sustainable Chem. Eng. (ACS Sustainable Chemistry & Engineering)	2023	Global Trade	Historic Data Regression	Electrolysis	PEM					2.3					€/kg (2023)	South Africa
274	Materializing International Trade of Decarbonized Hydrogen Through Optimization in Both Economic and Environmental Aspects	Kim, Ayeon; Kim, Heehyang; Lim, Dongjun; Cheon, Seunghyun; Lim, Hankwon	10.1021/acssuschemeng.2c05026	ACS Sustainable Chem. Eng. (ACS Sustainable Chemistry & Engineering)	2023	Global Trade	Historic Data Regression	Electrolysis	PEM							1.7664			€/kg (2023)	South Africa
275	Materializing International Trade of Decarbonized Hydrogen Through Optimization in Both Economic and Environmental Aspects	Kim, Ayeon; Kim, Heehyang; Lim, Dongjun; Cheon, Seunghyun; Lim, Hankwon	10.1021/acssuschemeng.2c05027	ACS Sustainable Chem. Eng. (ACS Sustainable Chemistry & Engineering)	2023	Global Trade	Historic Data Regression	Electrolysis	PEM							1.7388			€/kg (2023)	Australia
276	Materializing International Trade of Decarbonized Hydrogen Through Optimization in Both Economic and Environmental Aspects	Kim, Ayeon; Kim, Heehyang; Lim, Dongjun; Cheon, Seunghyun; Lim, Hankwon	10.1021/acssuschemeng.2c05028	ACS Sustainable Chem. Eng. (ACS Sustainable Chemistry & Engineering)	2023	Global Trade	Historic Data Regression	Electrolysis	PEM							1.6836			€/kg (2023)	Spain
277	Materializing International Trade of Decarbonized Hydrogen Through Optimization in Both Economic and Environmental Aspects	Kim, Ayeon; Kim, Heehyang; Lim, Dongjun; Cheon, Seunghyun; Lim, Hankwon	10.1021/acssuschemeng.2c05029	ACS Sustainable Chem. Eng. (ACS Sustainable Chemistry & Engineering)	2023	Global Trade	Historic Data Regression	Electrolysis	PEM									1.6836	€/kg (2023)	Australia
278	Materializing International Trade of Decarbonized Hydrogen Through Optimization in Both Economic and Environmental Aspects	Kim, Ayeon; Kim, Heehyang; Lim, Dongjun; Cheon, Seunghyun; Lim, Hankwon	10.1021/acssuschemeng.2c05030	ACS Sustainable Chem. Eng. (ACS Sustainable Chemistry & Engineering)	2023	Global Trade	Historic Data Regression	Electrolysis	PEM									1.6008	€/kg (2023)	Australia
279	Materializing International Trade of Decarbonized Hydrogen Through Optimization in Both Economic and Environmental Aspects	Kim, Ayeon; Kim, Heehyang; Lim, Dongjun; Cheon, Seunghyun; Lim, Hankwon	10.1021/acssuschemeng.2c05031	ACS Sustainable Chem. Eng. (ACS Sustainable Chemistry & Engineering)	2023	Global Trade	Historic Data Regression	Electrolysis	PEM									1.6008	€/kg (2023)	Spain
280	Materializing International Trade of Decarbonized Hydrogen Through Optimization in Both Economic and Environmental Aspects	Kim, Ayeon; Kim, Heehyang; Lim, Dongjun; Cheon, Seunghyun; Lim, Hankwon	10.1021/acssuschemeng.2c05024	ACS Sustainable Chem. Eng. (ACS Sustainable Chemistry & Engineering)	2023	Global Trade	Historic Data Regression	SMR + CCS						2.3644					€/kg (2023)	Qatar
281	Minimizing the cost of hydrogen production through dynamic polymer electrolyte membrane electrolyzer operation	Ginsberg, Michael J.; Venkatraman, Maya; Esposito, Daniel V.; Fthenakis, Vasilis M.	10.1016/j.xcrp.2022.100935	Cell Reports Physical Science	2022	Case Study	Bottom-Up	Electrolysis	PEM	0.745219				0.745219					€/kg (2023)	USA
282	Minimizing the cost of hydrogen production through dynamic polymer electrolyte membrane electrolyzer operation	Ginsberg, Michael J.; Venkatraman, Maya; Esposito, Daniel V.; Fthenakis, Vasilis M.	10.1016/j.xcrp.2022.100936	Cell Reports Physical Science	2022	Case Study	Bottom-Up	Electrolysis	PEM	1.24203				1.24203					€/kg (2023)	USA
283	Minimizing the cost of hydrogen production through dynamic polymer electrolyte membrane electrolyzer operation	Ginsberg, Michael J.; Venkatraman, Maya; Esposito, Daniel V.; Fthenakis, Vasilis M.	10.1016/j.xcrp.2022.100937	Cell Reports Physical Science	2022	Case Study	Bottom-Up	Electrolysis	PEM	1.83821				1.78853					€/kg (2023)	USA
284	Minimizing the cost of hydrogen production through dynamic polymer electrolyte membrane electrolyzer operation	Ginsberg, Michael J.; Venkatraman, Maya; Esposito, Daniel V.; Fthenakis, Vasilis M.	10.1016/j.xcrp.2022.100938	Cell Reports Physical Science	2022	Case Study	Bottom-Up	Electrolysis	PEM	2.3847				2.3847					€/kg (2023)	USA
285	Minimizing the cost of hydrogen production through dynamic polymer electrolyte membrane electrolyzer operation	Ginsberg, Michael J.; Venkatraman, Maya; Esposito, Daniel V.; Fthenakis, Vasilis M.	10.1016/j.xcrp.2022.100939	Cell Reports Physical Science	2022	Case Study	Bottom-Up	Electrolysis	PEM	2.88151				2.9312					€/kg (2023)	USA
286	Minimizing the cost of hydrogen production through dynamic polymer electrolyte membrane electrolyzer operation	Ginsberg, Michael J.; Venkatraman, Maya; Esposito, Daniel V.; Fthenakis, Vasilis M.	10.1016/j.xcrp.2022.100940	Cell Reports Physical Science	2022	Case Study	Bottom-Up	Electrolysis	PEM	3.37833				3.42801					€/kg (2023)	USA
287	Minimizing the cost of hydrogen production through dynamic polymer electrolyte membrane electrolyzer operation	Ginsberg, Michael J.; Venkatraman, Maya; Esposito, Daniel V.; Fthenakis, Vasilis M.	10.1016/j.xcrp.2022.100941	Cell Reports Physical Science	2022	Case Study	Bottom-Up	Electrolysis	PEM	3.87514				3.92482					€/kg (2023)	USA
288	Minimizing the cost of hydrogen production through dynamic polymer electrolyte membrane electrolyzer operation	Ginsberg, Michael J.; Venkatraman, Maya; Esposito, Daniel V.; Fthenakis, Vasilis M.	10.1016/j.xcrp.2022.100942	Cell Reports Physical Science	2022	Case Study	Bottom-Up	Electrolysis	PEM	4.42163				4.47132					€/kg (2023)	USA
289	Minimizing the cost of hydrogen production through dynamic polymer electrolyte membrane electrolyzer operation	Ginsberg, Michael J.; Venkatraman, Maya; Esposito, Daniel V.; Fthenakis, Vasilis M.	10.1016/j.xcrp.2022.100943	Cell Reports Physical Science	2022	Case Study	Bottom-Up	Electrolysis	PEM	0.695538				0.794901					€/kg (2023)	USA
290	Minimizing the cost of hydrogen production through dynamic polymer electrolyte membrane electrolyzer operation	Ginsberg, Michael J.; Venkatraman, Maya; Esposito, Daniel V.; Fthenakis, Vasilis M.	10.1016/j.xcrp.2022.100944	Cell Reports Physical Science	2022	Case Study	Bottom-Up	Electrolysis	PEM	1.19235				1.29171					€/kg (2023)	USA
291	Minimizing the cost of hydrogen production through dynamic polymer electrolyte membrane electrolyzer operation	Ginsberg, Michael J.; Venkatraman, Maya; Esposito, Daniel V.; Fthenakis, Vasilis M.	10.1016/j.xcrp.2022.100945	Cell Reports Physical Science	2022	Case Study	Bottom-Up	Electrolysis	PEM	1.73885				1.78853					€/kg (2023)	USA
292	Minimizing the cost of hydrogen production through dynamic polymer electrolyte membrane electrolyzer operation	Ginsberg, Michael J.; Venkatraman, Maya; Esposito, Daniel V.; Fthenakis, Vasilis M.	10.1016/j.xcrp.2022.100946	Cell Reports Physical Science	2022	Case Study	Bottom-Up	Electrolysis	PEM	2.28534				2.3847					€/kg (2023)	USA
293	Minimizing the cost of hydrogen production through dynamic polymer electrolyte membrane electrolyzer operation	Ginsberg, Michael J.; Venkatraman, Maya; Esposito, Daniel V.; Fthenakis, Vasilis M.	10.1016/j.xcrp.2022.100947	Cell Reports Physical Science	2022	Case Study	Bottom-Up	Electrolysis	PEM	2.83183				2.88151					€/kg (2023)	USA
294	Minimizing the cost of hydrogen production through dynamic polymer electrolyte membrane electrolyzer operation	Ginsberg, Michael J.; Venkatraman, Maya; Esposito, Daniel V.; Fthenakis, Vasilis M.	10.1016/j.xcrp.2022.100948	Cell Reports Physical Science	2022	Case Study	Bottom-Up	Electrolysis	PEM	3.37833				3.37833					€/kg (2023)	USA
295	Minimizing the cost of hydrogen production through dynamic polymer electrolyte membrane electrolyzer operation	Ginsberg, Michael J.; Venkatraman, Maya; Esposito, Daniel V.; Fthenakis, Vasilis M.	10.1016/j.xcrp.2022.100949	Cell Reports Physical Science	2022	Case Study	Bottom-Up	Electrolysis	PEM	3.92482				3.92482					€/kg (2023)	USA
296	Minimizing the cost of hydrogen production through dynamic polymer electrolyte membrane electrolyzer operation	Ginsberg, Michael J.; Venkatraman, Maya; Esposito, Daniel V.; Fthenakis, Vasilis M.	10.1016/j.xcrp.2022.100950	Cell Reports Physical Science	2022	Case Study	Bottom-Up	Electrolysis	PEM	4.37195				4.42163					€/kg (2023)	USA
297	On the outlook for solar thermal hydrogen production in South Africa	J.E. Hoffmann	https://doi.org/10.1016/j.ijhydene.2018.11.069	International Journal of Hydrogen Energy	2019	Case Study	Bottom-Up	Electrolysis	AE				4.09589						€/kg (2023)	South Africa
298	On the outlook for solar thermal hydrogen production in South Africa	J.E. Hoffmann	https://doi.org/10.1016/j.ijhydene.2018.11.070	International Journal of Hydrogen Energy	2019	Case Study	Bottom-Up	Electrolysis	AE				3.50617						€/kg (2023)	South Africa
299	On the outlook for solar thermal hydrogen production in South Africa	J.E. Hoffmann	https://doi.org/10.1016/j.ijhydene.2018.11.071	International Journal of Hydrogen Energy	2019	Case Study	Bottom-Up	Cu-Cl cycle					3.39895						€/kg (2023)	South Africa
300	Path to hydrogen competitiveness A cost perspective	Hydrogen Council		Grey Reports & Books	2020	Forecast	Bottom-Up	SMR + CCS					1.26377						€/kg (2023)	USA
301	Path to hydrogen competitiveness A cost perspective	Hydrogen Council		Grey Reports & Books	2020	Forecast	Bottom-Up	SMR + CCS					1.26377						€/kg (2023)	Middle East
302	Path to hydrogen competitiveness A cost perspective	Hydrogen Council		Grey Reports & Books	2020	Forecast	Bottom-Up	SMR + CCS						1.89565					€/kg (2023)	Europe
303	Path to hydrogen competitiveness A cost perspective	Hydrogen Council		Grey Reports & Books	2020	Forecast	Bottom-Up	Electrolysis	PEM & AE				2.00096	1.26377					€/kg (2023)	Chile
304	Path to hydrogen competitiveness A cost perspective	Hydrogen Council		Grey Reports & Books	2020	Forecast	Bottom-Up	Electrolysis	PEM & AE				2.00096	1.26377					€/kg (2023)	Australia
305	Path to hydrogen competitiveness A cost perspective	Hydrogen Council		Grey Reports & Books	2020	Forecast	Bottom-Up	Electrolysis	PEM & AE				2.00096	1.26377					€/kg (2023)	Saudi Arabia
306	Path to hydrogen competitiveness A cost perspective	Hydrogen Council		Grey Reports & Books	2020	Forecast	Bottom-Up	Electrolysis	PEM & AE	6.31883				2.73816					€/kg (2023)	Europe
307	Pathway toward cost-effective green hydrogen production by solid oxide electrolyzer	Liu, Hua; Clausen, Lasse Røngaard; Wang, Ligang; Chen, Ming	10.1039/D3EE00232B	Energy & Environmental Science	2023	Case Study	Bottom-Up/Learning Rate	Electrolysis	SOEC				2.622		1.5065				€/kg (2023)	Europe
308	Pathway toward cost-effective green hydrogen production by solid oxide electrolyzer	Liu, Hua; Clausen, Lasse Røngaard; Wang, Ligang; Chen, Ming	10.1039/D3EE00232B	Energy & Environmental Science	2023	Case Study	Bottom-Up/Learning Rate	Electrolysis	SOEC				3.657		2.369				€/kg (2023)	Europe
309	Pathways to a hydrogen fuel infrastructure in Norway	Stiller, Christoph; Bünger, Ulrich; Møller-Holst, Steffen; Svensson, Ann Mari; Espegren, Kari A.; Nowak, Matthias	10.1016/j.ijhydene.2009.04.003	International Journal of Hydrogen Energy	2010	Mobility	Bottom-Up	Mix (Biomass, SMR, Electrolysis)	N/A	8.5871			5.26935	5.04817	5.10021	5.45151	5.73774	6.06301	€/kg (2023)	Norway
310	Potential and risks of hydrogen-based e-fuels in climate change mitigation	Ueckerdt, Falko; Bauer, Christian; Dirnaichner, Alois; Everall, Jordan; Sacchi, Romain; Luderer, Gunnar	10.1038/s41558-021-01032-7	Nat. Clim. Chang. (Nature Climate Change)	2021	Forecast	Learning Rate/Bottom-Up	Electrolysis	PEM & AE	2.62163				1.87259				1.12356	€/kg (2023)	Libya
311	Potential economic benefits of carbon dioxide (CO2) reduction due to renewable energy and electrolytic hydrogen fuel deployment under current and long term forecasting of the Social Carbon Cost (SCC)	Rahil, Abdulla; Gammon, Rupert; Brown, Neil; Udie, Justin; Mazhar, Muhammad Usman	10.1016/j.egyr.2019.05.003	Energy Reports	2019	Case Study	Bottom-Up	Electrolysis	AE					8.65054					€/kg (2023)	Libya
312	Power-to-Gas Hydrogen: Techno-economic Assessment of Processes towards a Multi-purpose Energy Carrier	Ferrero, Domenico; Gamba, Martina; Lanzini, Andrea; Santarelli, Massimo	10.1016/j.egypro.2016.11.007	Energy Procedia	2016	Case Study	Bottom-Up	Electrolysis	AE					2.73491					€/kg (2023)	Italy
313	Power-to-Gas Hydrogen: Techno-economic Assessment of Processes towards a Multi-purpose Energy Carrier	Ferrero, Domenico; Gamba, Martina; Lanzini, Andrea; Santarelli, Massimo	10.1016/j.egypro.2016.11.007	Energy Procedia	2016	Case Study	Bottom-Up	Electrolysis	PEM					2.37818					€/kg (2023)	Italy
314	Power-to-Gas Hydrogen: Techno-economic Assessment of Processes towards a Multi-purpose Energy Carrier	Ferrero, Domenico; Gamba, Martina; Lanzini, Andrea; Santarelli, Massimo	10.1016/j.egypro.2016.11.007	Energy Procedia	2016	Case Study	Bottom-Up	Electrolysis	SOEC					2.73491					€/kg (2023)	Italy
315	Power-to-Gas Hydrogen: Techno-economic Assessment of Processes towards a Multi-purpose Energy Carrier	Ferrero, Domenico; Gamba, Martina; Lanzini, Andrea; Santarelli, Massimo	10.1016/j.egypro.2016.11.007	Energy Procedia	2016	Case Study	Bottom-Up	Electrolysis	AE					1.42691					€/kg (2023)	Italy
316	Power-to-Gas Hydrogen: Techno-economic Assessment of Processes towards a Multi-purpose Energy Carrier	Ferrero, Domenico; Gamba, Martina; Lanzini, Andrea; Santarelli, Massimo	10.1016/j.egypro.2016.11.007	Energy Procedia	2016	Case Study	Bottom-Up	Electrolysis	PEM					1.18909					€/kg (2023)	Italy
317	Power-to-Gas Hydrogen: Techno-economic Assessment of Processes towards a Multi-purpose Energy Carrier	Ferrero, Domenico; Gamba, Martina; Lanzini, Andrea; Santarelli, Massimo	10.1016/j.egypro.2016.11.007	Energy Procedia	2016	Case Study	Bottom-Up	Electrolysis	SOEC					1.42691					€/kg (2023)	Italy
318	Production of hydrogen from offshore wind in China and cost-competitive supply to Japan	Song, Shaojie; Lin, Haiyang; Sherman, Peter; Yang, Xi; Nielsen, Chris P.; Chen, Xinyu; McElroy, Michael B.	10.1038/s41467-021-27214-7	Nature communications	2021	Global Trade	Bottom-Up	Electrolysis	PEM & AE & SOEC					1.46683				1.213	€/kg (2023)	China
319	Production of hydrogen from offshore wind in China and cost-competitive supply to Japan	Song, Shaojie; Lin, Haiyang; Sherman, Peter; Yang, Xi; Nielsen, Chris P.; Chen, Xinyu; McElroy, Michael B.	10.1038/s41467-021-27214-8	Nature communications	2021	Global Trade	Bottom-Up	Electrolysis	PEM & AE & SOEC					1.45643				1.21716	€/kg (2023)	China
320	Production of hydrogen from offshore wind in China and cost-competitive supply to Japan	Song, Shaojie; Lin, Haiyang; Sherman, Peter; Yang, Xi; Nielsen, Chris P.; Chen, Xinyu; McElroy, Michael B.	10.1038/s41467-021-27214-9	Nature communications	2021	Global Trade	Bottom-Up	Electrolysis	PEM & AE & SOEC					1.48347				1.2234	€/kg (2023)	China
321	Production of hydrogen from offshore wind in China and cost-competitive supply to Japan	Song, Shaojie; Lin, Haiyang; Sherman, Peter; Yang, Xi; Nielsen, Chris P.; Chen, Xinyu; McElroy, Michael B.	10.1038/s41467-021-27214-10	Nature communications	2021	Global Trade	Bottom-Up	Electrolysis	PEM & AE & SOEC					1.48556				1.20571	€/kg (2023)	China
322	Projected economic outlook and scenario analysis for H 2 production by alkaline water electrolysis on the basis of the unit electricity price, the learning rate, and the automation level	Lee, Boreum; Lee, Hyunjun; Cho, Hyun-Seok; Cho, Won-Chul; Kim, Chang-Hee; Lim, Hankwon	10.1039/C9SE00148D	Sustainable Energy Fuels (Sustainable Energy & Fuels)	2019	Forecast	Learning Rate	Electrolysis	AE					9.0174					€/kg (2023)	South Korea
323	Projected economic outlook and scenario analysis for H 2 production by alkaline water electrolysis on the basis of the unit electricity price, the learning rate, and the automation level	Lee, Boreum; Lee, Hyunjun; Cho, Hyun-Seok; Cho, Won-Chul; Kim, Chang-Hee; Lim, Hankwon	10.1039/C9SE00148D	Sustainable Energy Fuels (Sustainable Energy & Fuels)	2019	Forecast	Learning Rate	Electrolysis	AE					6.61562					€/kg (2023)	South Korea
324	Projected economic outlook and scenario analysis for H 2 production by alkaline water electrolysis on the basis of the unit electricity price, the learning rate, and the automation level	Lee, Boreum; Lee, Hyunjun; Cho, Hyun-Seok; Cho, Won-Chul; Kim, Chang-Hee; Lim, Hankwon	10.1039/C9SE00148D	Sustainable Energy Fuels (Sustainable Energy & Fuels)	2019	Forecast	Learning Rate	Electrolysis	AE					4.36395					€/kg (2023)	South Korea
325	Projected economic outlook and scenario analysis for H 2 production by alkaline water electrolysis on the basis of the unit electricity price, the learning rate, and the automation level	Lee, Boreum; Lee, Hyunjun; Cho, Hyun-Seok; Cho, Won-Chul; Kim, Chang-Hee; Lim, Hankwon	10.1039/C9SE00148D	Sustainable Energy Fuels (Sustainable Energy & Fuels)	2019	Forecast	Learning Rate	Electrolysis	AE					4.19239					€/kg (2023)	South Korea
326	Projected economic outlook and scenario analysis for H 2 production by alkaline water electrolysis on the basis of the unit electricity price, the learning rate, and the automation level	Lee, Boreum; Lee, Hyunjun; Cho, Hyun-Seok; Cho, Won-Chul; Kim, Chang-Hee; Lim, Hankwon	10.1039/C9SE00148D	Sustainable Energy Fuels (Sustainable Energy & Fuels)	2019	Forecast	Learning Rate	Electrolysis	AE					0.579					€/kg (2023)	South Korea
327	Projected economic outlook and scenario analysis for H 2 production by alkaline water electrolysis on the basis of the unit electricity price, the learning rate, and the automation level	Lee, Boreum; Lee, Hyunjun; Cho, Hyun-Seok; Cho, Won-Chul; Kim, Chang-Hee; Lim, Hankwon	10.1039/C9SE00148D	Sustainable Energy Fuels (Sustainable Energy & Fuels)	2019	Forecast	Learning Rate	Electrolysis	AE					0.525389					€/kg (2023)	South Korea
328	Projecting cost development for future large-scale power-to-gas implementations by scaling effects	Böhm, Hans; Zauner, Andreas; Rosenfeld, Daniel C.; Tichler, Robert	10.1016/j.apenergy.2020.114780	Applied Energy	2020	Forecast	Learning Rate	Electrolysis	PEM	21.1198				9.80564				3.64569	€/kg (2023)	Germany
329	Projecting cost development for future large-scale power-to-gas implementations by scaling effects	Böhm, Hans; Zauner, Andreas; Rosenfeld, Daniel C.; Tichler, Robert	10.1016/j.apenergy.2020.114780	Applied Energy	2020	Forecast	Learning Rate	Electrolysis	PEM	13.577				7.29138				3.64569	€/kg (2023)	Germany
330	Renewable and low carbon hydrogen for California – Modeling the long term evolution of fuel infrastructure using a quasi-spatial TIMES model	Yang, Christopher; Ogden, Joan M.	10.1016/j.ijhydene.2013.01.195	International Journal of Hydrogen Energy	2013	Mobility	Learning Rate	Mix (NG, Coal, Biomass, Electrolysis) with CCS	N/A	6.21526			5.04257	5.1012		4.45622		4.9253	€/kg (2023)	USA
331	Renewable Hydrogen From the Zn/ZnO Solar Thermochemical Cycle: A Cost and Policy Analysis	Haltiwanger, Julia F.; Davidson, Jane H.; Wison, Elizabeth J.	10.1115/1.4002511	Journal of Solar Energy Engineering	2010	Case Study	Bottom-Up/Learning Rate	Zn/ZnO Solar Thermochemical Cycle								9.78895			€/kg (2023)
332	Solar hydrogen production by the Hybrid Sulfur process	Corgnale, Claudio; Summers, William A.	10.1016/j.ijhydene.2011.05.173	International Journal of Hydrogen Energy	2011	Case Study	Bottom-Up	Thermochemical water splitting					3.93883						€/kg (2023)	USA
333	Spatially-resolved analysis of the challenges and opportunities of Power-to-Gas (PtG) in Baden-Württemberg until 2040	König, Sebastian; Bchini, Quentin; McKenna, Russell; Köppel, Wolfgang; Bachseitz, Michael; Michaelis, Julia	10.1016/j.egypro.2017.09.511	Energy Procedia	2017	Forecast	Bottom-Up	Electrolysis	N/A					4.06273				3.20637	€/kg (2023)	Germany
334	Spatially-resolved analysis of the challenges and opportunities of Power-to-Gas (PtG) in Baden-Württemberg until 2040	König, Sebastian; Bchini, Quentin; McKenna, Russell; Köppel, Wolfgang; Bachseitz, Michael; Michaelis, Julia	10.1016/j.egypro.2017.09.511	Energy Procedia	2017	Forecast	Bottom-Up	SMR						3.10679				1.79238	€/kg (2023)	Germany
335	Spatio-temporal optimization of a future energy system for power-to-hydrogen applications in Germany	Welder, Lara; Ryberg, D.Severin; Kotzur, Leander; Grube, Thomas; Robinius, Martin; Stolten, Detlef	10.1016/j.energy.2018.05.059	Energy	2018	Case Study	Bottom-Up	Electrolysis	PEM									4.43851	€/kg (2023)	Germany
336	Spatio-temporal optimization of a future energy system for power-to-hydrogen applications in Germany	Welder, Lara; Ryberg, D.Severin; Kotzur, Leander; Grube, Thomas; Robinius, Martin; Stolten, Detlef	10.1016/j.energy.2018.05.060	Energy	2018	Case Study	Bottom-Up	Electrolysis	PEM									4.3217	€/kg (2023)	Germany
337	Spatio-temporal optimization of a future energy system for power-to-hydrogen applications in Germany	Welder, Lara; Ryberg, D.Severin; Kotzur, Leander; Grube, Thomas; Robinius, Martin; Stolten, Detlef	10.1016/j.energy.2018.05.061	Energy	2018	Case Study	Bottom-Up	Electrolysis	PEM									4.65716	€/kg (2023)	Germany
338	Study on early business cases for H2 in energy storage and more broadly power to H2 applications	Tractebel (Engie); Hinicio		Grey Reports & Books	2017	Case Study	Bottom-Up	Electrolysis	PEM & AE				4.03484						€/kg (2023)	Denmark
339	Study on early business cases for H2 in energy storage and more broadly power to H2 applications	Tractebel (Engie); Hinicio		Grey Reports & Books	2017	Case Study	Bottom-Up	Electrolysis	PEM & AE				2.72945						€/kg (2023)	Germany
340	Study on early business cases for H2 in energy storage and more broadly power to H2 applications	Tractebel (Engie); Hinicio		Grey Reports & Books	2017	Case Study	Bottom-Up	Electrolysis	PEM & AE				4.86554						€/kg (2023)	France
341	Supply curves of electricity-based gaseous fuels in the MENA region	Lux, Benjamin; Gegenheimer, Johanna; Franke, Katja; Sensfuß, Frank; Pfluger, Benjamin	10.1016/j.cie.2021.107647	Computers & Industrial Engineering	2021	Forecast	Learning Rate	Electrolysis	PEM					4.86874				3.55793	€/kg (2023)	MENA
343	Techno-economic analysis of a decarbonized shipping sector: Technology suggestions for a fleet in 2030 and 2040	Horvath, Stephen; Fasihi, Mahdi; Breyer, Christian	10.1016/j.enconman.2018.02.098	Energy Conversion and Management	2018	Mobility	Bottom-Up	Electrolysis	N/A					2.12171		1.80053			€/kg (2023)	Argentina
344	Techno-Economic Analysis of Photovoltaic Hydrogen Production Considering Technological Progress Uncertainty	Huang, Xiang; Qu, Yapan; Zhu, Zhentao; Wu, Qiuchi	10.3390/su15043580	Sustainability	2023	Forecast	Learning Rate	Electrolysis	PEM	6.175				2.99				1.69	€/kg (2023)	China
345	Techno-Economic Assessment of Demand-Driven Small-Scale Green Hydrogen Production for Low Carbon Agriculture in Sweden	Janke, Leandro; McDonagh, Shane; Weinrich, Sören; Nilsson, Daniel; Hansson, Per-Anders; Nordberg, Åke	10.3389/fenrg.2020.595224	Front. Energy Res. (Frontiers in Energy Research)	2020	Case Study	Bottom-Up	Electrolysis	PEM	23.9885				16.7693					€/kg (2023)	Sweden
346	Techno-Economic Assessment of Demand-Driven Small-Scale Green Hydrogen Production for Low Carbon Agriculture in Sweden	Janke, Leandro; McDonagh, Shane; Weinrich, Sören; Nilsson, Daniel; Hansson, Per-Anders; Nordberg, Åke	10.3389/fenrg.2020.595224	Front. Energy Res. (Frontiers in Energy Research)	2020	Case Study	Bottom-Up	Electrolysis	PEM	19.1116				13.1824					€/kg (2023)	Sweden
347	Techno-Economic Assessment of Demand-Driven Small-Scale Green Hydrogen Production for Low Carbon Agriculture in Sweden	Janke, Leandro; McDonagh, Shane; Weinrich, Sören; Nilsson, Daniel; Hansson, Per-Anders; Nordberg, Åke	10.3389/fenrg.2020.595224	Front. Energy Res. (Frontiers in Energy Research)	2020	Case Study	Bottom-Up	Electrolysis	PEM	17.9574				12.4808					€/kg (2023)	Sweden
348	Techno-Economic Assessment of Demand-Driven Small-Scale Green Hydrogen Production for Low Carbon Agriculture in Sweden	Janke, Leandro; McDonagh, Shane; Weinrich, Sören; Nilsson, Daniel; Hansson, Per-Anders; Nordberg, Åke	10.3389/fenrg.2020.595224	Front. Energy Res. (Frontiers in Energy Research)	2020	Case Study	Bottom-Up	Electrolysis	PEM	17.3238				12.2998					€/kg (2023)	Sweden
349	Techno-Economic Assessment of Demand-Driven Small-Scale Green Hydrogen Production for Low Carbon Agriculture in Sweden	Janke, Leandro; McDonagh, Shane; Weinrich, Sören; Nilsson, Daniel; Hansson, Per-Anders; Nordberg, Åke	10.3389/fenrg.2020.595224	Front. Energy Res. (Frontiers in Energy Research)	2020	Case Study	Bottom-Up	Electrolysis	PEM	15.6378				11.0551					€/kg (2023)	Sweden
350	Techno-economic assessment of dispatchable hydrogen production by multiple electrolysers in Libya	Rahil, Abdulla; Gammon, Rupert; Brown, Neil	10.1016/j.est.2017.12.016	Journal of Energy Storage	2018	Case Study	Bottom-Up	Electrolysis	AE					8.72486					€/kg (2023)	Libya
351	Techno-economic assessment of offshore wind-to-hydrogen scenarios: A UK case study	Giampieri, Alessandro; Ling-Chin, Janie; Roskilly, Anthony Paul	10.1016/j.ijhydene.2023.01.346	International Journal of Hydrogen Energy	2023	Case Study	Bottom-Up	Electrolysis	PEM				5.9085	3.8259				2.5857	€/kg (2023)	United Kingdom
352	Techno-economic evaluation of medium scale power to hydrogen to combined heat and power generation systems	Skordoulias, Nikolaos; Koytsoumpa, Efthymia Ioanna; Karellas, Sotirios	10.1016/j.ijhydene.2022.06.057	International Journal of Hydrogen Energy	2022	Case Study	Bottom-Up	Electrolysis	PEM		5.2143			3.78105					€/kg (2023)	Europe
353	Techno-economic feasibility of fleets of far offshore hydrogen-producing wind energy converters	Babarit, Aurélien; Gilloteaux, Jean-Christophe; Clodic, Gaël; Duchet, Maxime; Simoneau, Alexandre; Platzer, Max F.	10.1016/j.ijhydene.2018.02.144	International Journal of Hydrogen Energy	2018	Case Study	Bottom-Up	Electrolysis	AE				5.96862	5.96862	2.73319	2.73319			€/kg (2023)	"Wind Island"
354	Techno-economic Study of an Electrolysis-Based Green Ammonia Production Plant	Sousa, Joana; Waiblinger, Wendelin; Friedrich, Kaspar Andreas	10.1021/acs.iecr.2c00383	Ind. Eng. Chem. Res. (Industrial & Engineering Chemistry Research)	2022	Case Study	Bottom-Up	Electrolysis	PEM	4.368			4.2588	4.1496					€/kg (2023)	Norway
355	Techno-economic Study of an Electrolysis-Based Green Ammonia Production Plant	Sousa, Joana; Waiblinger, Wendelin; Friedrich, Kaspar Andreas	10.1021/acs.iecr.2c00383	Ind. Eng. Chem. Res. (Industrial & Engineering Chemistry Research)	2022	Case Study	Bottom-Up	Electrolysis	PEM	3.276			3.1668	3.0576					€/kg (2023)	Norway
356	Techno-economic Study of an Electrolysis-Based Green Ammonia Production Plant	Sousa, Joana; Waiblinger, Wendelin; Friedrich, Kaspar Andreas	10.1021/acs.iecr.2c00383	Ind. Eng. Chem. Res. (Industrial & Engineering Chemistry Research)	2022	Case Study	Bottom-Up	Electrolysis	PEM	2.184			2.0748	1.9656					€/kg (2023)	Norway
357	The cost dynamics of hydrogen supply in future energy systems – A techno-economic study	Öberg, Simon; Odenberger, Mikael; Johnsson, Filip	10.1016/j.apenergy.2022.120233	Applied Energy	2022	Forecast	Bottom-Up	Electrolysis	N/A									0.8736	€/kg (2023)	United Kingdom
358	The cost dynamics of hydrogen supply in future energy systems – A techno-economic study	Öberg, Simon; Odenberger, Mikael; Johnsson, Filip	10.1016/j.apenergy.2022.120233	Applied Energy	2022	Forecast	Bottom-Up	Electrolysis	N/A									1.2012	€/kg (2023)	Spain
359	The cost dynamics of hydrogen supply in future energy systems – A techno-economic study	Öberg, Simon; Odenberger, Mikael; Johnsson, Filip	10.1016/j.apenergy.2022.120233	Applied Energy	2022	Forecast	Bottom-Up	Electrolysis	N/A									1.3104	€/kg (2023)	Sweden
360	The cost dynamics of hydrogen supply in future energy systems – A techno-economic study	Öberg, Simon; Odenberger, Mikael; Johnsson, Filip	10.1016/j.apenergy.2022.120233	Applied Energy	2022	Forecast	Bottom-Up	Electrolysis	N/A									1.4196	€/kg (2023)	Germany
361	The economics of global green ammonia trade – “Shipping Australian wind and sunshine to Germany"	Egerer, Jonas; Grimm, Veronika; Niazmand, Kiana; Runge, Philipp	10.1016/j.apenergy.2023.120662	Applied Energy	2023	Global Trade	Bottom-Up	Electrolysis	PEM & AE					2.94604					€/kg (2023)	Australia
362	The future of solar fuels: when could they become competitive?	Detz, R. J.; Reek, J. N. H.; van der Zwaan, B. C. C.	10.1039/C8EE00111A	Energy Environ. Sci. (Energy & Environmental Science)	2018	Case Study	Bottom-Up/Learning Rate	Electrolysis	AE	5.1179			4.37865	3.75312		3.41193		3.07074	€/kg (2023)	International
363	The future of solar fuels: when could they become competitive?	Detz, R. J.; Reek, J. N. H.; van der Zwaan, B. C. C.	10.1039/C8EE00111A	Energy Environ. Sci. (Energy & Environmental Science)	2018	Case Study	Bottom-Up/Learning Rate	Electrolysis	PEM	5.80028			4.54924	3.75312		2.72955		2.27462	€/kg (2023)	International
364	The future of solar fuels: when could they become competitive?	Detz, R. J.; Reek, J. N. H.; van der Zwaan, B. C. C.	10.1039/C8EE00111A	Energy Environ. Sci. (Energy & Environmental Science)	2018	Case Study	Bottom-Up/Learning Rate	Electrolysis	SOEC	4.32178			3.18447	2.27462		1.70597		1.36477	€/kg (2023)	International
365	The future of solar fuels: when could they become competitive?	Detz, R. J.; Reek, J. N. H.; van der Zwaan, B. C. C.	10.1039/C8EE00111A	Energy Environ. Sci. (Energy & Environmental Science)	2018	Case Study	Bottom-Up/Learning Rate	Photoelectrochemical water splitting (PEC)		8.4161			6.25521	4.66297		3.18447		2.50208	€/kg (2023)	International
366	The future role of Power-to-Gas in the energy transition: Regional and local techno-economic analyses in Baden-Württemberg	McKenna, R. C.; Bchini, Q.; Weinand, J. M.; Michaelis, J.; König, S.; Köppel, W.; Fichtner, W.	10.1016/j.apenergy.2017.12.017	Applied Energy	2018	Case Study	Bottom-Up	Electrolysis	N/A					2.72513				1.55721	€/kg (2023)	Germany
367	The future role of Power-to-Gas in the energy transition: Regional and local techno-economic analyses in Baden-Württemberg	McKenna, R. C.; Bchini, Q.; Weinand, J. M.; Michaelis, J.; König, S.; Köppel, W.; Fichtner, W.	10.1016/j.apenergy.2017.12.018	Applied Energy	2018	Case Study	Bottom-Up	Electrolysis	N/A					1.55721				0.973259	€/kg (2023)	Germany
368	The future role of Power-to-Gas in the energy transition: Regional and local techno-economic analyses in Baden-Württemberg	McKenna, R. C.; Bchini, Q.; Weinand, J. M.; Michaelis, J.; König, S.; Köppel, W.; Fichtner, W.	10.1016/j.apenergy.2017.12.019	Applied Energy	2018	Case Study	Bottom-Up	Electrolysis	N/A					1.16791				0.583956	€/kg (2023)	Germany
369	The future role of Power-to-Gas in the energy transition: Regional and local techno-economic analyses in Baden-Württemberg	McKenna, R. C.; Bchini, Q.; Weinand, J. M.; Michaelis, J.; König, S.; Köppel, W.; Fichtner, W.	10.1016/j.apenergy.2017.12.020	Applied Energy	2018	Case Study	Bottom-Up	Electrolysis	N/A					0.778607				0.389304	€/kg (2023)	Germany
370	The future role of Power-to-Gas in the energy transition: Regional and local techno-economic analyses in Baden-Württemberg	McKenna, R. C.; Bchini, Q.; Weinand, J. M.; Michaelis, J.; König, S.; Köppel, W.; Fichtner, W.	10.1016/j.apenergy.2017.12.021	Applied Energy	2018	Case Study	Bottom-Up	Electrolysis	N/A					6.81281				5.06095	€/kg (2023)	Germany
371	The future role of Power-to-Gas in the energy transition: Regional and local techno-economic analyses in Baden-Württemberg	McKenna, R. C.; Bchini, Q.; Weinand, J. M.; Michaelis, J.; König, S.; Köppel, W.; Fichtner, W.	10.1016/j.apenergy.2017.12.022	Applied Energy	2018	Case Study	Bottom-Up	Electrolysis	N/A					5.2556				4.28234	€/kg (2023)	Germany
372	The future role of Power-to-Gas in the energy transition: Regional and local techno-economic analyses in Baden-Württemberg	McKenna, R. C.; Bchini, Q.; Weinand, J. M.; Michaelis, J.; König, S.; Köppel, W.; Fichtner, W.	10.1016/j.apenergy.2017.12.023	Applied Energy	2018	Case Study	Bottom-Up	Electrolysis	N/A					4.67164				3.9709	€/kg (2023)	Germany
373	The future role of Power-to-Gas in the energy transition: Regional and local techno-economic analyses in Baden-Württemberg	McKenna, R. C.; Bchini, Q.; Weinand, J. M.; Michaelis, J.; König, S.; Köppel, W.; Fichtner, W.	10.1016/j.apenergy.2017.12.024	Applied Energy	2018	Case Study	Bottom-Up	Electrolysis	N/A					4.47699				3.81518	€/kg (2023)	Germany
374	The future role of Power-to-Gas in the energy transition: Regional and local techno-economic analyses in Baden-Württemberg	McKenna, R. C.; Bchini, Q.; Weinand, J. M.; Michaelis, J.; König, S.; Köppel, W.; Fichtner, W.	10.1016/j.apenergy.2017.12.025	Applied Energy	2018	Case Study	Bottom-Up	SMR						2.72513				4.67164	€/kg (2023)	Germany
375	The importance of economies of scale, transport costs and demand patterns in optimising hydrogen fuelling infrastructure: An exploration with SHIPMod (Spatial hydrogen infrastructure planning model)	Agnolucci, Paolo; Akgul, Ozlem; McDowall, William; Papageorgiou, Lazaros G.	10.1016/j.ijhydene.2013.06.071	International Journal of Hydrogen Energy	2013	Mobility	Bottom-Up/Learning Rate	Mix (SMR; SMR+CCS; Biomass Gasification)		5.98072			5.04257	4.80803	4.45622	4.10442	3.81124		€/kg (2023)	United Kingdom
376	The value chain of green hydrogen for fuel cell buses e A case study for the Rhine-Main area in Germany*	Coleman, D.; Kopp, M.; Wagner, T.; Scheppat, B.	10.1016/j.ijhydene.2019.06.163	International Journal of Hydrogen Energy	2020	Mobility	Bottom-Up	Electrolysis	PEM				2.26307						€/kg (2023)	Germany
377	Transition to a low-carbon building stock. Techno-economic and spatial optimization of renewables‑hydrogen strategies in Spain	Maestre, V. M.; Ortiz, A.; Ortiz, I.	10.1016/j.est.2022.105889	Journal of Energy Storage	2022	Forecast	Bottom-Up	Electrolysis	PEM					3.8666				1.99023	€/kg (2023)	Spain
378	Transition to a low-carbon building stock. Techno-economic and spatial optimization of renewables‑hydrogen strategies in Spain	Maestre, V. M.; Ortiz, A.; Ortiz, I.	10.1016/j.est.2022.105891	Journal of Energy Storage	2022	Forecast	Bottom-Up	SMR						3.82546				3.82546	€/kg (2023)	Spain
379	Transition to a low-carbon building stock. Techno-economic and spatial optimization of renewables‑hydrogen strategies in Spain	Maestre, V. M.; Ortiz, A.; Ortiz, I.	10.1016/j.est.2022.105890	Journal of Energy Storage	2022	Forecast	Bottom-Up	SMR + CCS						2.2605				2.2605	€/kg (2023)	Spain
